# Supplementary material for: Mechanistic insights on hydrazones synthesis: a combined theoretical and experimental study
Source: Royal Society of Chemistry journal article supplement (doi:10.1039/d5cp00170f), 2025-01-01
Supplement: d5cp00170f2.pdf [file d5cp00170f2.pdf]

## **Supporting Information**

### **Mechanistic insights on hydrazones synthesis: a combined theoretical and experimental study**

Nissrine Al Assaad,<sup>1,2</sup> Alain Chamayou,<sup>1</sup> Rachel Calvet,<sup>1,\*</sup> Manuel Pedrón,<sup>2,\*</sup> Ilaria Ciofini,<sup>2</sup> Frédéric Labat.<sup>2,\*</sup>

<sup>1</sup> Centre RAPSODEE (Recherche d'Albi en génie des Procédés des Solides Divisés, de l'Energie et de l'Environnement), IMT Mines Albi, UMR CNRS 5302, Université de Toulouse, Campus Jarlard, Allée des Sciences, CEDEX 09, F-81013 Albi, France

<sup>2</sup> PSL University, Chimie ParisTech, CNRS, Institute of Chemistry for Life and Health Sciences, F-75005 Paris, France

### **INDEX:**

#### **EXPERIMENTAL METHODS:**

|                                         |       |
|-----------------------------------------|-------|
| HPLC measurements .....                 | pp. 2 |
| NMR Characterization .....              | pp. 3 |
| Experimental Operating Conditions ..... | pp. 3 |
| Kinetic Model .....                     | pp. 4 |

#### **COMPUTATIONAL METHODS:**

|                                                           |        |
|-----------------------------------------------------------|--------|
| TS1 Conformational Study.....                             | pp. 5  |
| Gas Phase Relative Energies .....                         | pp. 6  |
| Implicit Solvent Model Relative Energies .....            | pp. 15 |
| Implicit + Explicit Solvent Model Relative Energies ..... | pp. 22 |
| Optimized Structures .....                                | pp. 31 |

## EXPERIMENTAL METHODS

### HPLC measurements

To monitor the reaction kinetics, samples were collected at specific time intervals and analysed by High-Performance Liquid Chromatography (HPLC), from Agilent Technologies (model 1260 Infinity II). A reversed-phase Poroshell 120 EC-C18 column (4.6 x 100 mm, 4 $\mu$ m), purchased from Agilent Technologies, was employed for separation and analysis. The mobile phase consisted of a mixture of methanol (MeOH) and a phosphate buffer solution (pH = 7) maintained at a controlled temperature of 298.15 K. A multi-step hybrid elution method was employed, as detailed in **Table S 1**. The flow rate was maintained at 0.7 mL/min, and a 10  $\mu$ L sample volume was injected. Detection of the analytes was carried out at a wavelength of 260 nm using a UV-Vis detector.

**Prior to analysis**, samples were diluted in a solvent mixture composed of MeOH, phosphate buffer, and acetone in a ratio of 40:35:25, respectively. Acetone was introduced into the dissolution medium to immediately quench the reaction between Isoniazid and Isophthalaldehyde after sampling. This large excess acetone reacts with Isoniazid, converting it into a product that is unreactive towards Isophthalaldehyde.

The HPLC system was calibrated using a set of six standards prepared from both commercially available reagents and synthesized products. Given the commercial unavailability of the monohydrazone and dihydrazone, these compounds were synthesized according to the procedure described below. These standards generated highly linear calibration curves with coefficient of determination ( $R^2$ ) values ranging from 0.99992 to 0.99997.

**Table S 1:** HPLC elution method.

| Time (min) | MeOH (%) | Phosphate (%) | Buffer | Elution type    |
|------------|----------|---------------|--------|-----------------|
| 0-5        | 20       | 80            |        | Isocratic       |
| 5-7        | 20-50    | 80-50         |        | Linear gradient |
| 7-17       | 50       | 50            |        | Isocratic       |
| 17-19      | 50-20    | 50-80         |        | Linear gradient |
| 19-21      | 20       | 80            |        | Isocratic       |

The monohydrazone was synthesized using an excess of isophthalaldehyde, with an isoniazid/isophthalaldehyde molar ratio of 1:2. The solvent employed is ethanol (EtOH)<sup>7</sup>, and the mixture was refluxed for two hours. Upon completion of the reaction, the liquid reaction medium was concentrated under reduced pressure using a rotary evaporator. The resulting crude monohydrazone was purified through successive recrystallizations in a 3:7 EtOH/water mixture to eliminate any excess Isophthalaldehyde. To remove the dihydrazone by-product, additional purification was carried out using silica gel column chromatography with an eluent mixture<sup>7</sup> of ethyl acetate (EtOAc)/methanol (MeOH) in a ratio of 93:7.

Dihydrazone was synthesized in presence of an excess of isoniazid by refluxing a 2:1 molar ratio of isoniazid/isophthalaldehyde in EtOH for two hours. After removing the solvent under reduced pressure, the crude product was purified by successive recrystallizations from a 1:1 EtOH/H<sub>2</sub>O mixture to remove unreacted isoniazid and any monohydrazone by-product, resulting in pure dihydrazone.

### NMR Characterization

## Monohydrazone

Chemical shifts ( $\delta$ ) are reported in parts per million (ppm), with signal multiplicities designated as singlet (s), doublet (d), and triplet (t). Coupling constants ( $J$ ) are presented in hertz (Hz).

$^{13}\text{C}$  NMR:  $\delta$  122.03 (2C, C<sub>2'</sub>, C<sub>5'</sub>), 128.27 (C<sub>6</sub>), 130.26 (C<sub>2</sub>), 131.31 (C<sub>3</sub>), 133.4 (C<sub>4</sub>), 135.5 (C<sub>1</sub>), 137.15 (C<sub>5</sub>), 140.79 (C<sub>1'</sub>), 148.16 (C=N), 150.83 (2C, C<sub>3'</sub>, C<sub>4'</sub>), 162.27 (C=O), 193.45 (CH=O).

$^1\text{H}$  NMR:  $\delta$  7.71 (1H, (t,  $J$  = 7.6), H<sub>3</sub>), 7.85 (2H, (dd,  $J$  = 6.1, 1.7), H<sub>2'</sub>, H<sub>5'</sub>), 7.98 (1H, (d,  $J$  = 7.6), H<sub>4</sub>), 8.06 (1H, (d,  $J$  = 7.7), H<sub>2</sub>), 8.29 (1H, s, N=CH), 8.57 (1H, s, H<sub>6</sub>), 8.8 (2H, (dd,  $J$  = 6.1, 1.7), H<sub>3'</sub>, H<sub>4'</sub>), 10.09 (1H, s, CH=O), 12.22 (1H, s, NH).

MS  $m/z$  calculated for C<sub>14</sub>H<sub>11</sub>N<sub>3</sub>O<sub>2</sub> [M+H<sup>+</sup>]: 254.09, found: 254.0.

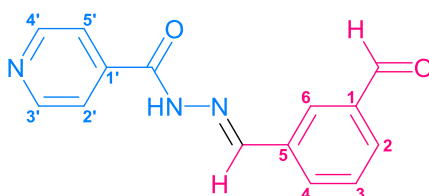

**Scheme S 1:** Monohydrazone structure with atom numbering for NMR characterization.

## Dihydrazone

Chemical shifts ( $\delta$ ) are reported in parts per million (ppm), with signal multiplicities designated as singlet (s), doublet (d), and triplet (t). Coupling constants ( $J$ ) are presented in hertz (Hz).

$^{13}\text{C}$  NMR:  $\delta$  122.03 (4C, C<sub>2'</sub>, C<sub>5'</sub>, C<sub>2''</sub>, C<sub>5''</sub>), 125.56 (C<sub>6</sub>), 129.79 (C<sub>3</sub>), 130 (2C, C<sub>2</sub>, C<sub>4</sub>), 135.19 (2C, C<sub>1</sub>, C<sub>5</sub>), 140.88 (2C, C=N, C=N), 148.81 (2C, C<sub>1'</sub>, C<sub>1''</sub>), 150.84 (4C, C<sub>3'</sub>, C<sub>4'</sub>, C<sub>3''</sub>, C<sub>4''</sub>), 162.24 (2C, C=O, C=O).

$^1\text{H}$  NMR:  $\delta$  7.59 (1H, (t,  $J$  = 7.7), H<sub>3</sub>), 7.82 (2H, (dd,  $J$  = 7.7, 1.8), H<sub>2</sub>, H<sub>4</sub>), 7.85 (4H, (d,  $J$  = 6.1), H<sub>2'</sub>, H<sub>5'</sub>, H<sub>2''</sub>, H<sub>5''</sub>), 8.17 (1H, s, H<sub>6</sub>), 8.54 (2H, s, N=CH, N=CH), 8.81 (4H, (d,  $J$  = 4.8), H<sub>3'</sub>, H<sub>4'</sub>, H<sub>3''</sub>, H<sub>4''</sub>), 12.17 (2H, s, NH, NH).

MS  $m/z$  calculated for C<sub>20</sub>H<sub>16</sub>N<sub>6</sub>O<sub>2</sub> [M+H<sup>+</sup>]: 372.13, found: 372.1.

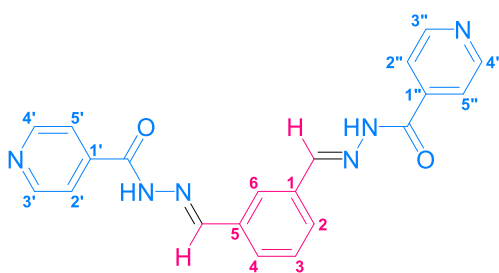

**Scheme S 2:** Dihydrazone structure with atom numbering for NMR characterization.

## Experimental Operating Conditions

Due to the limited solubility of isoniazid in acetonitrile at concentrations above 1.7 g/L, this initial concentration ( $C$  = 0.0124 mol/L) was used across both protic and aprotic solvent experiments to allow for consistent comparative analysis.

The reaction kinetics in both solvent systems were monitored over 7 hours at a controlled temperature of 298.15 K. Prior to initiating the reaction, each reactant was separately dissolved in the solvent and maintained at 298.15 K. First, isophthalaldehyde was introduced into the reactor. Then, using a dropping

funnel, isoniazid was added to the isophthalaldehyde solution over approximately 45 seconds, at equimolar concentrations ( $C = 0.0124$  mol/L) while stirring at 500 rpm. Ten samples, each representing 1% of the total volume, were collected at predetermined intervals: every 30 minutes for the first 2 hours, followed by hourly sampling over the remaining 5 hours. Each experiment was repeated three times, and the reported results represent the average of these three trials.

### Kinetic Model

Kinetic modelling of the reaction is conducted to determine the kinetic constant and the activation energy obtained experimentally. The rate laws describing the consumption of reactants and formation of products in the competitive consecutive reaction<sup>15</sup>, are expressed as follows:

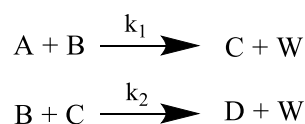

**Scheme S 3:** Representation of the competitive consecutive reaction system.

$$-\frac{dC_A}{dt} = k_1 \times C_A \times C_B \quad (\text{Eq. 1})$$

$$-\frac{dC_B}{dt} = k_1 \times C_A \times C_B + k_2 \times C_C \times C_B \quad (\text{Eq. 2})$$

$$\frac{dC_C}{dt} = k_1 \times C_A \times C_B - k_2 \times C_C \times C_B \quad (\text{Eq. 3})$$

$$\frac{dC_D}{dt} = k_2 \times C_C \times C_B \quad (\text{Eq. 4})$$

$$\frac{dC_W}{dt} = k_1 \times C_A \times C_B + k_2 \times C_C \times C_B \quad (\text{Eq. 5})$$

Where  $C_W$  is water concentration in mol.L<sup>-1</sup> at time t, and  $k_1$  and  $k_2$  are the kinetic constants for monohydrazone and dihydrazone formation, respectively.

However, since water was identified as both a product and a catalyst of the reaction, the model above has been modified to incorporate it as an auto-catalyst, as shown below:

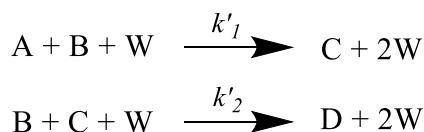

**Scheme S 4:** The competitive consecutive reaction system with the water as auto-catalyst.

$$-\frac{dC_A}{dt} = k'_1 \times C_A \times C_B \times C_W \quad (\text{Eq. 6})$$

$$-\frac{dC_B}{dt} = k'_1 \times C_A \times C_B \times C_W + k'_2 \times C_C \times C_B \times C_W \quad (\text{Eq. 7})$$

$$\frac{dC_C}{dt} = k'_1 \times C_A \times C_B \times C_W - k'_2 \times C_C \times C_B \times C_W \quad (\text{Eq. 8})$$

$$\frac{dC_D}{dt} = k'_2 \times C_C \times C_B \times C_W \quad (\text{Eq. 9})$$

$$\begin{aligned} \frac{dC_W}{dt} = & -k'_1 \times C_A \times C_B \times C_W - k'_2 \times C_C \times C_B \times C_W + 2 k'_1 \times C_A \times C_B \times C_W \\ & + 2 k'_2 \times C_C \times C_B \times C_W \end{aligned} \quad (\text{Eq. 10})$$

Where  $k'_1$  and  $k'_2$  are the kinetic constants for monohydrazone and dihydrazone formation, respectively, in presence of water as an auto-catalyst.

## COMPUTATIONAL METHODS

### TS1 Conformational Study

All possible conformers studied are depicted in **Scheme S 5, a**. Due to the symmetry plane of isophthalaldehyde, only 3 rotamers should be considered. However, the bond formation with the isoniazid breaks the inherent symmetry of the system, resulting in 4 different conformers to be considered (see **Scheme S 5, b**). Regarding isoniazid, both E/Z isomers of the amide group were considered, as well as the two different rotamers of the N-N bond. Finally, three starting  $\theta$  angle rotamer geometries ( $60^\circ$ ,  $180^\circ$ , and  $-60^\circ$ ) were studied for the forming bond. Only  $N^a$ -O eclipsed conformations ( $\theta \approx 0^\circ$ ) could be located, resulting in a total of 16 TS with both E and Z conformations of the amide moiety.

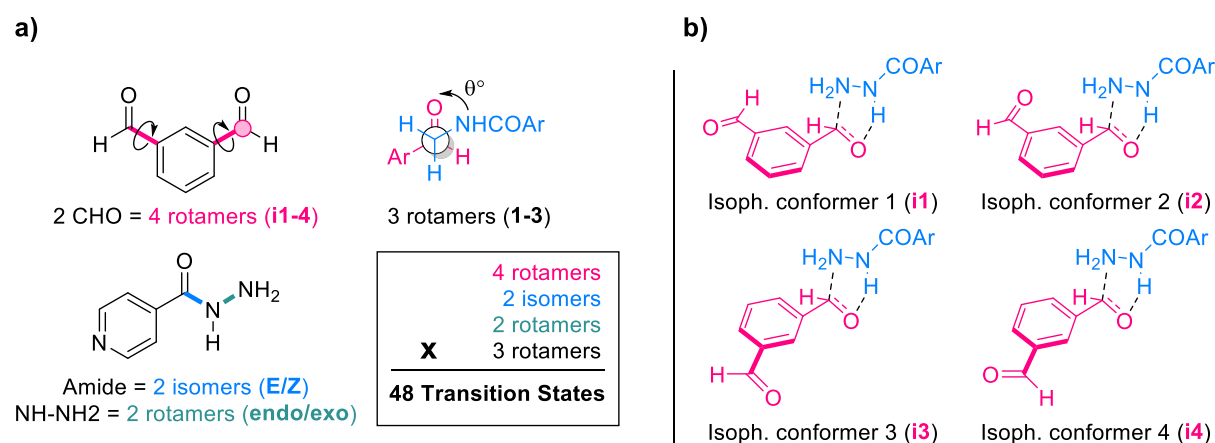

**Scheme S 5 : a)** Possible conformers and rotamers of the starting materials considered for the formation of **TS1**. **b)** Conformers of the Isophthalaldehyde considered for **TS1**. Mirror-inverted geometries are displayed for clarity.

Similar to the condensation with hydrazines, no alkoxide intermediate could be located. IRC calculations demonstrated that the subsequent proton transfer occurs in a concerted matter, connecting **TS1-Z** directly to the first intermediate **IN1-Z** (**Figure S 1, a**). Relaxed scans from other geometries only revealed increase in energy, with no minima or TS observed (**Figure S 1, c**). The absence of this interaction is the main reason for not finding other  $\theta$  rotamers different from  $\theta \approx 0^\circ$ . Once the nucleophilic attack takes place, the initial conformation of the amide group leads to the E/Z configuration of the double bond in **IN1**, creating two different intermediates, **IN1-Z** and **IN1-E**. All TS leading to **IN1-E** were found to be less stable when compared to those leading to **IN1-Z** due to the lack of electronic conjugation caused by the steric hindrance between the pyridine and the terminal amino group in the E-configured amide (see **Figure S 1, a, b, d**). Therefore, while all the conformers of **TS1-Z** presented barriers between 20.5 and 22.0 kcal/mol, the range of all TS leading to **IN1-E** were higher, between 33.6 and 34.9 kcal/mol (see **Table S 2**). Same analysis can be also applied for the thermodynamic stability of the first intermediates (**Table S 4**).

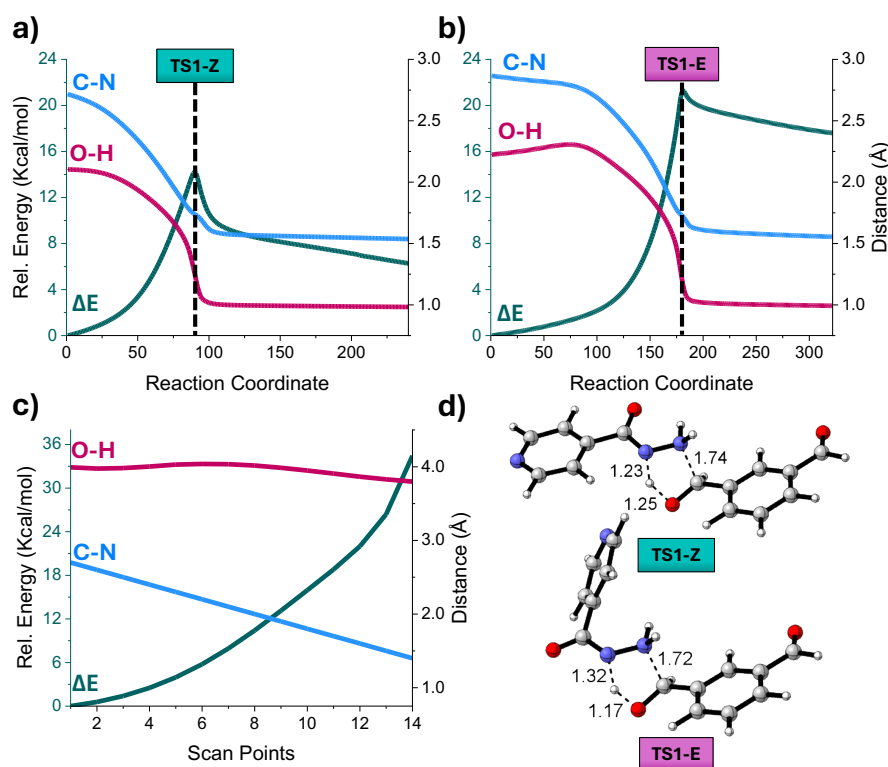

**Figure S 1:** **a)** Intrinsic Reaction Coordinate (IRC) of **TS1-Z** performed at PBE0/6-311+G(d,p) level. C-N and O-H distances are represented as blue and magenta continuous lines, respectively. Relative energy is depicted in dark green. The black dashed lines represent the TS position along the reaction coordinate. **b)** IRC of the lowest **IN1-E** forming TS (**TS1-E**) at the same level of theory. **c)** C-N forming bond scan starting from a non-eclipsed conformation. **d)** Optimized geometries of **TS1-Z** and **TS1-E** at the same level of theory.

Relative energies and first vibrational frequencies of all located **TS1** can be found in **Table S 2**. Colour code is relative to the conformers displayed in **Scheme S 5**. Since only conformers with  $\theta = 0^\circ$  could be located, no numeration for the 1-3 rotamers is included.

### Gas Phase Relative Energies

Located encounter pairs for the reactants (denoted as **RE**) and first reaction intermediates (denoted and **IN1**) relative energies are collected in **Table S 3** and **Table S 4**, respectively.

**Table S 2:** Calculated relative energies (kcal/mol) and first vibrational frequencies for all the located conformers for **TS1** regarding the nomenclature displayed in **Scheme S 5**.

| TS1                  | $\Delta E$ | $\Delta E_0$ | $\Delta G$ | Freq   |
|----------------------|------------|--------------|------------|--------|
| TS1_i1_Z_endo        | 17.9       | 17.0         | 21.4       | -947.5 |
| TS1_i2_Z_endo        | 17.2       | 16.3         | 20.7       | -944.5 |
| TS1_i3_Z_endo        | 18.6       | 17.7         | 22.0       | -950.3 |
| TS1_i4_Z_endo        | 17.8       | 16.9         | 21.3       | -946.9 |
| TS1_i1_Z_exo         | 17.5       | 16.6         | 20.9       | -948.8 |
| TS1_i2_Z_exo (TS1-Z) | 17.0       | 16.1         | 20.5       | -939.7 |
| TS1_i3_Z_exo         | 18.0       | 17.1         | 21.3       | -950.9 |

|                       |      |      |      |        |
|-----------------------|------|------|------|--------|
| TS1_i4_Z_exo          | 17.3 | 16.4 | 20.8 | -946.2 |
| TS1_i1_E_endo         | 31.5 | 30.3 | 34.2 | -708.6 |
| TS1_i2_E_endo (TS1-E) | 30.7 | 29.6 | 33.6 | -729.7 |
| TS1_i3_E_endo         | 32.0 | 30.7 | 34.5 | -761.2 |
| TS1_i4_E_endo         | 31.3 | 30.2 | 33.9 | -691.8 |
| TS1_i1_E_exo          | 31.3 | 30.1 | 34.2 | -835.3 |
| TS1_i2_E_exo          | 30.7 | 29.6 | 33.7 | -814.3 |
| TS1_i3_E_exo          | 32.1 | 30.8 | 34.9 | -872.0 |
| TS1_i4_E_exo          | 31.2 | 30.0 | 34.2 | -837.9 |

**Table S 3:** Calculated relative energies (kcal/mol) for all the located conformers for **RE**.

| RE         | $\Delta E$ | $\Delta E_0$ | $\Delta G$ |
|------------|------------|--------------|------------|
| RE_a1      | 0.8        | 0.7          | 0.8        |
| RE_a2      | 0.0        | 0.0          | 0.1        |
| RE_a3      | 0.1        | 0.1          | 0.0        |
| RE_a4      | 0.8        | 0.7          | 0.8        |
| RE_a5      | 0.1        | 0.1          | 0.0        |
| RE_a6      | 0.0        | 0.0          | 0.0        |
| RE_a7      | 0.1        | 0.1          | 0.0        |
| RE_a8 (RE) | 0.1        | 0.1          | 0.0        |

**Table S 4:** Calculated relative energies (kcal/mol) for all the located conformers for **IN1** regarding the nomenclature displayed in Scheme S 5.

| IN1                  | $\Delta E$ | $\Delta E_0$ | $\Delta G$ |
|----------------------|------------|--------------|------------|
| IN1_i1_Z_endo        | 9.1        | 11.2         | 15.4       |
| IN1_i2_Z_endo        | 8.4        | 10.6         | 14.9       |
| IN1_i3_Z_endo        | 9.8        | 11.9         | 16.1       |
| IN1_i4_Z_endo        | 9.0        | 11.2         | 15.4       |
| IN1_i1_Z_exo         | 7.4        | 9.7          | 14.0       |
| IN1_i2_Z_exo         | 7.5        | 9.8          | 14.1       |
| IN1_i3_Z_exo         | 7.6        | 9.9          | 14.1       |
| IN1_i4_Z_exo (IN1-Z) | 7.3        | 9.6          | 13.9       |

|               |      |      |      |
|---------------|------|------|------|
| IN1_i1_E_endo | 26.6 | 28.5 | 32.4 |
| IN1_i2_E_endo | 26.5 | 28.4 | 32.2 |
| IN1_i3_E_endo | 26.9 | 28.8 | 32.6 |
| IN1_i4_E_endo | 26.5 | 28.4 | 32.3 |
| IN1_i1_E_exo  | 26.6 | 28.5 | 32.4 |
| IN1_i2_E_exo  | 26.5 | 28.4 | 32.2 |
| IN1_i3_E_exo  | 26.9 | 28.8 | 32.6 |
| IN1_i4_E_exo  | 26.5 | 28.4 | 32.3 |

Relative energies for the next step via TS2 and further IN2 are collected in **Tables S 5 - 6**.

**Table S 5:** Calculated relative energies (kcal/mol) and first vibrational frequencies for all the located conformers for TS2 regarding the nomenclature displayed in **Scheme S 5**.

| TS2              | $\Delta E$ | $\Delta E_0$ | $\Delta G$ | Freq    |
|------------------|------------|--------------|------------|---------|
| TS2_i1_endo      | 14.1       | 13.6         | 18.0       | -1067.6 |
| TS2_i2_endo      | 14.1       | 13.6         | 17.8       | -1062.2 |
| TS2_i3_endo      | 14.1       | 13.6         | 18.1       | -1091.8 |
| TS2_i4_endo      | 14.1       | 13.6         | 17.8       | -1066.3 |
| TS2_i1_exo       | 9.6        | 9.4          | 13.9       | -1079.1 |
| TS2_i2_exo (TS2) | 9.5        | 9.3          | 13.9       | -1079.5 |
| TS2_i3_exo       | 9.8        | 9.7          | 14.1       | -1086.4 |
| TS2_i4_exo       | 15.7       | 15.3         | 19.8       | -1054.2 |

**Table S 6:** Calculated relative energies (kcal/mol) for all the located conformers for IN2 regarding the nomenclature displayed in **Scheme S 5**.

| IN2              | $\Delta E$ | $\Delta E_0$ | $\Delta G$ |
|------------------|------------|--------------|------------|
| IN2_i1_endo      | 6.4        | 8.2          | 11.7       |
| IN2_i2_endo      | 6.9        | 8.7          | 12.6       |
| IN2_i3_endo      | 6.0        | 7.8          | 11.6       |
| IN2_i4_endo      | 6.8        | 8.5          | 12.2       |
| IN2_i1_exo       | 2.3        | 4.4          | 8.4        |
| IN2_i2_exo (IN2) | 2.1        | 4.1          | 8.2        |
| IN2_i3_exo       | 2.7        | 4.7          | 8.7        |



|            |     |     |     |
|------------|-----|-----|-----|
| IN2_i4_exo | 2.3 | 4.3 | 8.3 |
|------------|-----|-----|-----|

From this point pathways a, b, and c can be followed. For pathway a, the first step consists of a dehydration to form a double C-N bond. Relative energies for all conformations of **TS3a** are collected in **Table S 7**. Since linear conformation of the isoniazid is preferred, no more endo/exo notation is relevant. Regarding the barriers, the formation of the E-hydrazone is preferred over the Z. Regarding so, all **IN3a\_Z** were discarded. Relative energies for the corresponding intermediate, **IN3a\_E**, can be seen in **Table S 8**. For clarity, after de dehydration, same i1-i4 notation was conserved to define the conformation of the recently formed C-N double bond.

**Table S 7:** Calculated relative energies (kcal/mol) and first vibrational frequencies for all the located conformers for **TS3a** regarding the nomenclature for the isophthalaldehyde's conformation displayed in **Scheme S 5**.

| TS3a             | $\Delta E$ | $\Delta E_0$ | $\Delta G$ | Freq    |
|------------------|------------|--------------|------------|---------|
| TS3a_i1_E (TS3a) | 54.0       | 51.0         | 55.3       | -1788.2 |
| TS3a_i2_E        | 54.3       | 51.3         | 55.5       | -1810.6 |
| TS3a_i3_E        | 54.0       | 51.0         | 55.3       | -1774.3 |
| TS3a_i4_E        | 54.1       | 51.1         | 55.4       | -1791.4 |
| TS3a_i1_Z        | 56.8       | 53.8         | 58.1       | -1817.9 |
| TS3a_i2_Z        | 56.3       | 53.3         | 57.7       | -1814.4 |
| TS3a_i3_Z        | 57.2       | 54.2         | 58.5       | -1829.6 |
| TS3a_i4_Z        | 56.7       | 53.6         | 57.9       | -1818.7 |

**Table S 8:** Calculated relative energies (kcal/mol) for all the located conformers for **IN3a** regarding the nomenclature displayed for the isophthalaldehyde's conformation displayed in **Scheme S 5**, but being now between the aldehyde and the hydrazone groups.

| IN3a             | $\Delta E$ | $\Delta E_0$ | $\Delta G$ |
|------------------|------------|--------------|------------|
| IN3a_i1_E        | 2.3        | 1.6          | 5.1        |
| IN3a_i2_E        | 2.0        | 1.3          | 4.8        |
| IN3a_i3_E        | -0.3       | -1.1         | 1.8        |
| IN3a_i4_E (IN3a) | -0.4       | -1.2         | 1.6        |

Further steps to product formation relative energy through pathway a are displayed in **Table S 9 - 11**. For latest step (**TS5a**) the water assistance of the water molecule formed after dehydration is denotated as **-H2O**.

**Table S 9:** Calculated relative energies (kcal/mol) and first vibrational frequencies for all the located conformers for **TS4a** regarding the nomenclature for the isophthalaldehyde's conformation displayed in **Scheme S 5** but being now between the aldehyde and the hydrazone groups.

| TS4a           | $\Delta E$ | $\Delta E_0$ | $\Delta G$ | Freq   |
|----------------|------------|--------------|------------|--------|
| TS4a_i1        | 32.3       | 29.1         | 30.0       | -342.9 |
| TS4a_i2 (TS4a) | 32.1       | 28.9         | 29.3       | -337.3 |
| TS4a_i3        | 32.7       | 29.5         | 30.5       | -341.1 |
| TS4a_i4        | 32.3       | 29.1         | 30.0       | -343.1 |

**Table S 10:** Calculated relative energies (kcal/mol) for all the located conformers for **IN4a** regarding the nomenclature displayed for the isophthalaldehyde's conformation displayed in **Scheme S 5**, but being now between the aldehyde and the hydrazone groups.

| IN4a           | $\Delta E$ | $\Delta E_0$ | $\Delta G$ |
|----------------|------------|--------------|------------|
| IN4a_i1        | 2.3        | 1.6          | 5.1        |
| IN4a_i2 (IN4a) | 2.0        | 1.3          | 4.8        |
| IN4a_i3        | 2.9        | 2.2          | 5.6        |
| IN4a_i4        | 2.2        | 1.5          | 5.0        |

**Table S 11:** Calculated relative energies (kcal/mol) and first vibrational frequencies for all the located conformers for **TS5a** regarding the nomenclature for the isophthalaldehyde's conformation displayed in **Scheme S 5** but being now between the aldehyde and the hydrazone groups. -H2O suffix refer to the assistance of the water molecule generated after the dehydration.

| TS5a                   | $\Delta E$ | $\Delta E_0$ | $\Delta G$ | Freq    |
|------------------------|------------|--------------|------------|---------|
| TS5a_i1                | 38.2       | 33.4         | 34.3       | -1846.7 |
| TS5a_i2 (TS5a)         | 35.2       | 31.1         | 33.2       | -1845.6 |
| TS5a_i3                | 38.5       | 33.7         | 35.0       | -1843.7 |
| TS5a_i4                | 37.8       | 33.6         | 36.4       | -1853.0 |
| TS5a_i1-H2O            | 12.0       | 7.6          | 12.1       | -1507.3 |
| TS5a_i2-H2O (TS5a-H2O) | 11.7       | 7.4          | 11.8       | -1503.4 |
| TS5a_i3-H2O            | 12.5       | 8.1          | 12.4       | -1508.0 |
| TS5a_i4-H2O            | 11.9       | 7.6          | 12.0       | -1507.5 |

Regarding pathway b, as for **TS3a**, **TS3b** can also dehydrate through E- and Z-TS, being again the E-isomer thermodynamically more stable than the Z (see **Table S 12**). However, since this is not the rate-limiting step, Z-hydrazides cannot be discarded yet. Both E- and Z-intermediates and further isomerization after dehydration relative energies are collected in **Table S 13 - 14**. As for pathway a, -H2O suffix stands for the assistance of the generated water molecule on a given TS.

**Table S 12:** Calculated relative energies (kcal/mol) and first vibrational frequencies for all the located conformers for **TS3b** regarding the nomenclature for the isophthalaldehyde's conformation displayed in **Scheme S 5**.

| TS3b             | $\Delta E$ | $\Delta E_0$ | $\Delta G$ | Freq   |
|------------------|------------|--------------|------------|--------|
| TS3b_i1_E        | 23.4       | 21.8         | 26.7       | -650.7 |
| TS3b_i2_E (TS3b) | 23.1       | 21.5         | 26.5       | -651.2 |
| TS3b_i3_E        | 23.7       | 22.0         | 26.9       | -653.2 |
| TS3b_i4_E        | 23.4       | 21.7         | 26.7       | -649.2 |
| TS3b_i1_Z        | 25.2       | 23.6         | 28.3       | -670.4 |
| TS3b_i2_Z        | 24.7       | 23.2         | 28.0       | -630.0 |
| TS3b_i3_Z        | 26.0       | 24.3         | 29.0       | -679.4 |
| TS3b_i4_Z        | 25.0       | 23.4         | 28.1       | -667.9 |

**Table S 13:** Calculated relative energies (kcal/mol) for all the located conformers for **IN3b** regarding the nomenclature displayed for the isophthalaldehyde's conformation displayed in **Scheme S 5**, but being now between the aldehyde and the hydrazone groups.

| IN3b             | $\Delta E$ | $\Delta E_0$ | $\Delta G$ |
|------------------|------------|--------------|------------|
| IN3b_i1_E        | -0.3       | -0.5         | 2.9        |
| IN3b_i2_E        | -0.5       | -0.7         | 2.7        |
| IN3b_i3_E        | 0.2        | -0.2         | 3.1        |
| IN3b_i4_E (IN3b) | -0.6       | -0.8         | 2.6        |
| IN3b_i1_Z        | -1.1       | -1.3         | 1.8        |
| IN3b_i2_Z        | -1.4       | -1.4         | 1.5        |
| IN3b_i3_Z        | -1.0       | -1.1         | 2.5        |
| IN3b_i4_Z        | -1.3       | -1.4         | 1.8        |

**Table S 14:** Calculated relative energies (kcal/mol) and first vibrational frequencies for all the located conformers for **TS4b** regarding the nomenclature for the isophthalaldehyde's conformation displayed in **Scheme S 5** but being now between the aldehyde and the hydrazone groups. -H<sub>2</sub>O suffix refer to the assistance of the water molecule generated after the dehydration.

| TS4b             | $\Delta E$ | $\Delta E_0$ | $\Delta G$ | Freq    |
|------------------|------------|--------------|------------|---------|
| TS4b_i1_E (TS4b) | 58.1       | 53.3         | 55.9       | -1970.6 |
| TS4b_i2_E        | 59.2       | 54.2         | 56.5       | -1971.0 |
| TS4b_i3_E        | 58.3       | 53.5         | 56.0       | -1976.5 |
| TS4b_i4_E        | 58.3       | 53.5         | 56.0       | -1970.3 |

|                          |      |      |      |         |
|--------------------------|------|------|------|---------|
| TS4b_i1_Z                | 63.1 | 58.2 | 60.7 | -1968.1 |
| TS4b_i2_Z                | 63.4 | 58.6 | 61.4 | -1972.2 |
| TS4b_i3_Z                | 63.6 | 58.7 | 61.1 | -1970.2 |
| TS4b_i4_Z                | 63.1 | 58.2 | 60.5 | -1971.5 |
| TS4b_i1_E-H2O            | 24.2 | 20.0 | 24.1 | -1631.0 |
| TS4b_i2_E-H2O            | 24.3 | 20.1 | 24.2 | -1613.6 |
| TS4b_i3_E-H2O            | 24.5 | 20.2 | 24.2 | -1673.9 |
| TS4b_i4_E-H2O (TS4b-H2O) | 24.2 | 19.9 | 24.1 | -1626.8 |
| TS4b_i1_Z-H2O            | 30.8 | 26.7 | 31.4 | -1656.7 |
| TS4b_i2_Z-H2O            | 30.6 | 26.5 | 31.2 | -1655.2 |
| TS4b_i3_Z-H2O            | 31.1 | 26.9 | 31.6 | -1651.1 |
| TS4b_i4_Z-H2O            | 30.2 | 26.1 | 30.8 | -1653.7 |

Pathways a and b can be equilibrated between **IN3a** and **IN3b** through **TSeq**. Relative energies of all conformers are collected in **Table S 15**.

**Table S 15:** Calculated relative energies (kcal/mol) and first vibrational frequencies for all the located conformers for **TSeq** regarding the nomenclature for the isophthalaldehyde's conformation displayed in **Scheme S 5** but being now between the aldehyde and the hydrazone groups.

| TSeq             | $\Delta E$ | $\Delta E_0$ | $\Delta G$ | Freq    |
|------------------|------------|--------------|------------|---------|
| TSeq_i1_E (TSeq) | 8.4        | 5.2          | 8.2        | -1272.3 |
| TSeq_i2_E        | 8.6        | 5.4          | 8.3        | -1272.4 |
| TSeq_i3_E        | 8.9        | 5.6          | 8.6        | -1278.8 |
| TSeq_i4_E        | 8.4        | 5.2          | 8.2        | -1270.8 |
| TSeq_i1_Z        | 10.8       | 7.6          | 10.6       | -1249.1 |
| TSeq_i2_Z        | 10.5       | 7.4          | 10.4       | -1248.0 |
| TSeq_i3_Z        | 11.5       | 8.1          | 10.9       | -1272.9 |
| TSeq_i4_Z        | 10.3       | 7.2          | 10.3       | -1244.6 |

Pathway c starts instead by the isomerization. Relative energies for all located conformers for this step are collected in **Table S 16**. **Table S 17 – 20** collect all the relative energies for the further steps following this pathway.

**Table S 16:** Calculated relative energies (kcal/mol) and first vibrational frequencies for all the located conformers for **TS3c** regarding the nomenclature for the isophthalaldehyde's conformation displayed in **Scheme S 5**.

| TS3c | $\Delta E$ | $\Delta E_0$ | $\Delta G$ | Freq |
|------|------------|--------------|------------|------|
|------|------------|--------------|------------|------|

|                |      |      |      |        |
|----------------|------|------|------|--------|
| TS3c_i1        | 34.3 | 34.5 | 38.8 | -352.7 |
| TS3c_i2        | 34.3 | 34.6 | 38.8 | -351.9 |
| TS3c_i3        | 34.6 | 34.9 | 39.1 | -352.6 |
| TS3c_i4 (TS3c) | 34.2 | 34.4 | 38.8 | -352.5 |

**Table S 17:** Calculated relative energies (kcal/mol) for all the located conformers for **IN3c** regarding the nomenclature displayed for the isophthalaldehyde's conformation displayed in **Scheme S 5**.

| IN3c           | $\Delta E$ | $\Delta E_0$ | $\Delta G$ |
|----------------|------------|--------------|------------|
| IN3c_i1        | 7.6        | 9.2          | 13.5       |
| IN3c_i2 (IN3c) | 7.5        | 9.1          | 13.4       |
| IN3c_i3        | 8.0        | 9.6          | 13.9       |
| IN3c_i4        | 7.5        | 9.2          | 13.5       |

**Table S 18:** Calculated relative energies (kcal/mol) and first vibrational frequencies for all the located conformers for **TS4c** regarding the nomenclature for the isophthalaldehyde's conformation displayed in **Scheme S 5**.

| TS4c           | $\Delta E$ | $\Delta E_0$ | $\Delta G$ | Freq    |
|----------------|------------|--------------|------------|---------|
| TS4c_i1        | 40.4       | 39.0         | 42.7       | -1835.4 |
| TS4c_i2 (TS4c) | 39.9       | 38.6         | 42.4       | -1833.1 |
| TS4c_i3        | 40.7       | 39.3         | 43.0       | -1836.7 |
| TS4c_i4        | 40.3       | 38.9         | 42.7       | -1835.7 |

**Table S 19:** Calculated relative energies (kcal/mol) for all the located conformers for **IN4c** regarding the nomenclature displayed for the isophthalaldehyde's conformation displayed in **Scheme S 5**.

| IN4c           | $\Delta E$ | $\Delta E_0$ | $\Delta G$ |
|----------------|------------|--------------|------------|
| IN4c_i1        | -5.8       | -3.6         | 0.9        |
| IN4c_i2 (IN4c) | -6.2       | -3.9         | 0.5        |
| IN4c_i3        | -5.1       | -2.9         | 1.5        |
| IN4c_i4        | -5.9       | -3.7         | 0.8        |

**Table S 20:** Calculated relative energies (kcal/mol) and first vibrational frequencies for all the located conformers for **TS5c** regarding the nomenclature for the isophthalaldehyde's conformation displayed in **Scheme S 5**.

| TS5c           | $\Delta E$ | $\Delta E_0$ | $\Delta G$ | Freq    |
|----------------|------------|--------------|------------|---------|
| TS5c_i1 (TS5c) | 46.4       | 44.6         | 49.4       | -1576.8 |

|         |      |      |      |         |
|---------|------|------|------|---------|
| TS5c_i2 | 46.8 | 45.0 | 49.8 | -1577.7 |
| TS5c_i3 | 46.6 | 44.8 | 49.4 | -1576.7 |
| TS5c_i4 | 46.5 | 44.8 | 49.5 | -1578.2 |

Finally, relative energies regarding the first product of the reaction (**PR**) are collected in **Table S 21**.

**Table S 21:** Calculated relative energies (kcal/mol) for all the located conformers for **PR** regarding the nomenclature displayed for the isophthalaldehyde's conformation displayed in **Scheme S 5**.

| PR         | $\Delta E$ | $\Delta E_0$ | $\Delta G$ |
|------------|------------|--------------|------------|
| PR_i1      | -6.0       | -6.7         | -3.6       |
| PR_i2 (PR) | -6.3       | -7.0         | -3.9       |
| PR_i3      | -5.5       | -6.3         | -3.2       |
| PR_i4      | -6.1       | -6.8         | -3.7       |

The comparison between competing pathways a and b, with and without water assistance, is depicted in **Figure S 2**, where the greater stabilization of pathway b with the water assistance can be seen. This is a consequence of the higher ring strain released when transitioning from a 3-membered cycle to a 5-membered one (**TS4b**), compared to the four-to-six member increase in **TS5a**. Based on these results, pathway a will be the preferred route in dry solvents, where the availability of water molecules is limited. Pathway b could be followed in some situations in which water is more abundant, but as discussed in the main text, if a sufficient water molecules are present, other pathways may be followed (see subsequent models).

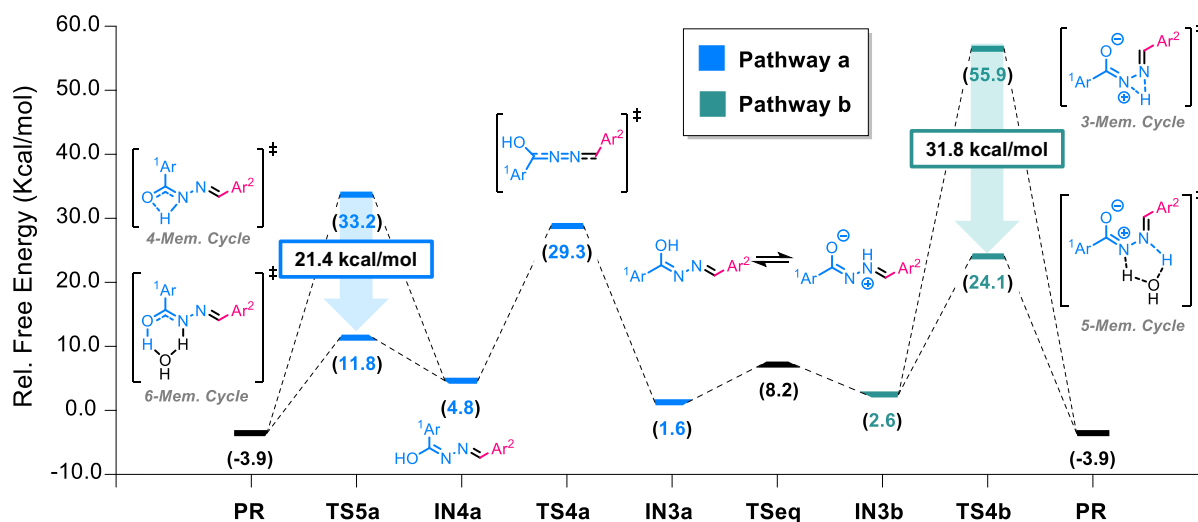

**Figure S 2:** Comparison of the energy profile and the stabilization with water-assistance of the two preferred pathways, pathways a (blue) and b (green) at PBE0/6-311+g(d,p) level of theory. With no assistance from the water molecule pathway a is the preferred route, while with assistance, pathway b becomes faster.

### Implicit solvent model relative energies

Same analysis as reported for the gas phase calculations were performed applying implicit solvent effects (here water), using CPCM. Suffix -i denotes the implicit inclusion of the solvent. Relative energy data is collected in **Tables S 22 – 41**.

**Table S 22:** Calculated relative energies (kcal/mol) for all the located conformers for **RE-i**.

| RE-i           | $\Delta E$ | $\Delta E_0$ | $\Delta G$ |
|----------------|------------|--------------|------------|
| RE-i_a1        | 0.3        | 0.2          | 0.4        |
| RE-i_a2        | 0.1        | 0.1          | 0.8        |
| RE-i_a3        | 0.0        | 0.0          | 0.9        |
| RE-i_a4        | 0.5        | 0.5          | 1.8        |
| RE-i_a5        | 0.1        | 0.1          | 1.0        |
| RE-i_a6        | 0.2        | 0.2          | 1.9        |
| RE-i_a7 (RE-i) | 0.1        | 0.1          | 0.0        |
| RE-i_a8        | 0.3        | 0.2          | 0.4        |

**Table S 23:** Calculated relative energies (kcal/mol) and first vibrational frequencies for all the located conformers for **TS1-i** regarding the nomenclature displayed in **Scheme S 5**.

| TS1-i                     | $\Delta E$ | $\Delta E_0$ | $\Delta G$ | Freq    |
|---------------------------|------------|--------------|------------|---------|
| TS1-i_i1_Z_endo           | 14.9       | 14.4         | 19.2       | -972.5  |
| TS1-i_i2_Z_endo (TS1_Z-i) | 14.8       | 14.4         | 18.9       | -970.5  |
| TS1-i_i3_Z_endo           | 14.9       | 14.4         | 19.2       | -969.2  |
| TS1-i_i4_Z_endo           | 14.8       | 14.4         | 19.0       | -969.0  |
| TS1-i_i1_Z_exo            | 15.0       | 14.5         | 19.2       | -969.3  |
| TS1-i_i2_Z_exo            | 15.0       | 14.4         | 19.0       | -968.5  |
| TS1-i_i3_Z_exo            | 15.0       | 14.6         | 19.3       | -961.0  |
| TS1-i_i4_Z_exo            | 14.9       | 14.4         | 19.0       | -963.2  |
| TS1-i_i1_E_endo           | 23.4       | 22.7         | 27.4       | -983.7  |
| TS1-i_i2_E_endo           | 23.3       | 22.7         | 27.5       | -989.5  |
| TS1-i_i3_E_endo           | 23.4       | 22.7         | 27.4       | -989.6  |
| TS1-i_i4_E_endo           | 23.4       | 22.7         | 27.2       | -1002.2 |
| TS1-i_i1_E_exo            | 23.4       | 22.7         | 27.2       | -1002.2 |
| TS1-i_i2_E_exo            | 23.4       | 22.7         | 27.4       | -989.8  |

|                |      |      |      |        |
|----------------|------|------|------|--------|
| TS1-i_i3_E_exo | 23.4 | 22.7 | 27.4 | -983.7 |
| TS1-i_i4_E_exo | 23.3 | 22.7 | 27.5 | -989.2 |

**Table S 24:** Calculated relative energies (kcal/mol) for all the located conformers for **IN1-i** regarding the nomenclature displayed in **Scheme S 5**.

| IN1-i                    | $\Delta E$ | $\Delta E_0$ | $\Delta G$ |
|--------------------------|------------|--------------|------------|
| IN1-i_i1_Z_endo          | 5.5        | 8.1          | 12.4       |
| IN1-i_i2_Z_endo          | 5.3        | 7.9          | 12.3       |
| IN1-i_i3_Z_endo          | 5.4        | 7.9          | 12.2       |
| IN1-i_i4_Z_endo          | 5.4        | 8.0          | 12.4       |
| IN1-i_i1_Z_exo (IN1-Z-i) | 5.2        | 7.7          | 11.8       |
| IN1-i_i2_Z_exo           | 5.1        | 7.7          | 12.3       |
| IN1-i_i3_Z_exo           | 5.1        | 7.7          | 12.1       |
| IN1-i_i4_Z_exo           | 5.1        | 7.7          | 12.0       |
| IN1-i_i1_E_endo          | 17.0       | 19.4         | 23.9       |
| IN1-i_i2_E_endo          | 16.8       | 19.2         | 23.7       |
| IN1-i_i3_E_endo          | 16.8       | 19.5         | 24.4       |
| IN1-i_i4_E_endo          | 16.8       | 19.3         | 24.1       |
| IN1-i_i1_E_exo           | 17.0       | 19.4         | 23.9       |
| IN1-i_i2_E_exo           | 16.8       | 19.2         | 23.7       |
| IN1-i_i3_E_exo           | 16.8       | 19.5         | 24.4       |
| IN1-i_i4_E_exo           | 16.8       | 19.3         | 24.1       |

**Table S 25:** Calculated relative energies (kcal/mol) and first vibrational frequencies for all the located conformers for **TS2-i** regarding the nomenclature displayed in **Scheme S 5**.

| TS2-i                | $\Delta E$ | $\Delta E_0$ | $\Delta G$ | Freq    |
|----------------------|------------|--------------|------------|---------|
| TS2-i_i1_endo        | 13.3       | 12.7         | 17.3       | -1237.5 |
| TS2-i_i2_endo        | 13.2       | 12.7         | 17.2       | -1237.4 |
| TS2-i_i3_endo        | 13.3       | 12.7         | 17.1       | -1235.3 |
| TS2-i_i4_endo        | 13.2       | 12.7         | 17.2       | -1235.4 |
| TS2-i_i1_exo         | 10.6       | 10.4         | 15.3       | -1229.9 |
| TS2-i_i2_exo (TS2-i) | 10.5       | 10.3         | 15.2       | -1233.3 |



|              |      |      |      |         |
|--------------|------|------|------|---------|
| TS2-i_i3_exo | 10.5 | 10.3 | 15.2 | -1230.5 |
| TS2-i_i4_exo | 13.3 | 13.1 | 17.9 | -1233.8 |

**Table S 26:** Calculated relative energies (kcal/mol) for all the located conformers for **IN2-i** regarding the nomenclature displayed in **Scheme S 5**.

| IN2-i                | $\Delta E$ | $\Delta E_0$ | $\Delta G$ |
|----------------------|------------|--------------|------------|
| IN2-i_i1_endo        | 7.3        | 9.0          | 13.1       |
| IN2-i_i2_endo        | 7.2        | 9.0          | 13.0       |
| IN2-i_i3_endo        | 7.2        | 9.0          | 13.2       |
| IN2-i_i4_endo        | 8.1        | 9.7          | 13.8       |
| IN2-i_i1_exo (IN2-i) | 4.9        | 6.7          | 10.6       |
| IN2-i_i2_exo         | 4.9        | 6.8          | 10.7       |
| IN2-i_i3_exo         | 4.8        | 6.6          | 10.8       |
| IN2-i_i4_exo         | 4.8        | 6.6          | 10.8       |

**Table S 27:** Calculated relative energies (kcal/mol) and first vibrational frequencies for all the located conformers for **TS3a-i** regarding the nomenclature for the isophthalaldehyde's conformation displayed in **Scheme S 5**. Only E-dehydration was considered.

| TS3a-i               | $\Delta E$ | $\Delta E_0$ | $\Delta G$ | Freq    |
|----------------------|------------|--------------|------------|---------|
| TS3a-i_i1_E          | 53.5       | 50.9         | 55.8       | -1638.7 |
| TS3a-i_i2_E          | 53.5       | 50.9         | 55.6       | -1639.5 |
| TS3a-i_i3_E (TS3a-i) | 53.5       | 50.8         | 55.4       | -1639.6 |
| TS3a-i_i4_E          | 53.6       | 50.9         | 55.6       | -1640.3 |

**Table S 28:** Calculated relative energies (kcal/mol) for all the located conformers for **IN3a-i** regarding the nomenclature displayed for the isophthalaldehyde's conformation displayed in **Scheme S 5**, but being now between the aldehyde and the hydrazone groups.

| IN3a-i               | $\Delta E$ | $\Delta E_0$ | $\Delta G$ |
|----------------------|------------|--------------|------------|
| IN3a-i_i1_E          | 1.0        | 0.1          | 2.9        |
| IN3a-i_i2_E          | 0.9        | 0.1          | 2.9        |
| IN3a-i_i3_E          | 1.2        | 0.2          | 2.9        |
| IN3a-i_i4_E (IN3a-i) | 1.0        | 0.1          | 2.7        |

**Table S 29:** Calculated relative energies (kcal/mol) and first vibrational frequencies for all the located conformers for **TS4a-i** regarding the nomenclature for the isophthalaldehyde's conformation displayed in **Scheme S 5** but being now between the aldehyde and the hydrazone groups.

| TS4a-i             | $\Delta E$ | $\Delta E_0$ | $\Delta G$ | Freq   |
|--------------------|------------|--------------|------------|--------|
| TS4a-i_i1          | 32.3       | 29.1         | 30.0       | -342.9 |
| TS4a-i_i2          | 32.3       | 29.1         | 29.9       | -335.1 |
| TS4a-i_i3          | 32.5       | 29.1         | 29.9       | -333.9 |
| TS4a-i_i4 (TS4a-i) | 32.3       | 28.9         | 28.4       | -335.5 |

**Table S 30:** Calculated relative energies (kcal/mol) for all the located conformers for **IN4a-i** regarding the nomenclature displayed for the isophthalaldehyde's conformation displayed in **Scheme S 5**, but being now between the aldehyde and the hydrazone groups.

| IN4a-i             | $\Delta E$ | $\Delta E_0$ | $\Delta G$ |
|--------------------|------------|--------------|------------|
| IN4a-i_i1          | 3.9        | 3.1          | 6.8        |
| IN4a-i_i2          | 3.8        | 3.0          | 6.8        |
| IN4a-i_i3          | 3.9        | 3.1          | 6.9        |
| IN4a-i_i4 (IN4a-i) | 3.8        | 3.0          | 6.7        |

**Table S 31:** Calculated relative energies (kcal/mol) and first vibrational frequencies for all the located conformers for **TS5a-i** regarding the nomenclature for the isophthalaldehyde's conformation displayed in **Scheme S 5** but being now between the aldehyde and the hydrazone groups. -H2O suffix refer to the assistance of the water molecule generated after the dehydration.

| TS5a-i                     | $\Delta E$ | $\Delta E_0$ | $\Delta G$ | Freq    |
|----------------------------|------------|--------------|------------|---------|
| TS5a-i_i1                  | 39.6       | 34.4         | 35.5       | -1877.8 |
| TS5a-i_i2 (TS5a-i)         | 37.3       | 32.9         | 34.3       | -1875.9 |
| TS5a-i_i3                  | 39.8       | 34.7         | 35.7       | -1877.2 |
| TS5a-i_i4                  | 38.4       | 34.2         | 37.3       | -1883.0 |
| TS5a-i_i1-H2O              | 13.2       | 8.6          | 13.5       | -1431.1 |
| TS5a-i_i2-H2O (TS5a-i-H2O) | 13.1       | 8.4          | 13.3       | -1431.8 |
| TS5a-i_i3-H2O              | 13.3       | 8.7          | 13.5       | -1432.7 |
| TS5a-i_i4-H2O              | 13.1       | 8.5          | 13.3       | -1433.6 |

**Table S 32:** Calculated relative energies (kcal/mol) and first vibrational frequencies for all the located conformers for **TS3b-i** regarding the nomenclature for the isophthalaldehyde's conformation displayed in **Scheme S 5**.

| TS3b-i | $\Delta E$ | $\Delta E_0$ | $\Delta G$ | Freq |
|--------|------------|--------------|------------|------|
|--------|------------|--------------|------------|------|

|                      |      |      |      |        |
|----------------------|------|------|------|--------|
| TS3b-i_i1_E (TS3b-i) | 21.5 | 20.1 | 25.3 | -579.1 |
| TS3b-i_i2_E          | 21.3 | 20.0 | 25.4 | -587.6 |
| TS3b-i_i3_E          | 21.4 | 20.1 | 25.4 | -589.8 |
| TS3b-i_i4_E          | 21.5 | 20.1 | 25.5 | -585.6 |
| TS3b-i_i1_Z          | 24.3 | 23.0 | 28.2 | -642.4 |
| TS3b-i_i2_Z          | 24.3 | 22.9 | 28.1 | -637.2 |
| TS3b-i_i3_Z          | 24.1 | 22.7 | 28.0 | -649.8 |
| TS3b-i_i4_Z          | 24.2 | 22.7 | 27.9 | -647.8 |

**Table S 33:** Calculated relative energies (kcal/mol) for all the located conformers for **IN3b-i** regarding the nomenclature displayed for the isophthalaldehyde's conformation displayed in **Scheme S 5**, but being now between the aldehyde and the hydrazone groups.

| IN3b-i               | $\Delta E$ | $\Delta E_0$ | $\Delta G$ |
|----------------------|------------|--------------|------------|
| IN3b-i_i1_E          | -0.4       | -0.6         | 3.1        |
| IN3b-i_i2_E (IN3b-i) | -0.4       | -0.7         | 3.0        |
| IN3b-i_i3_E          | -0.2       | -0.4         | 3.4        |
| IN3b-i_i4_E          | -0.4       | -0.7         | 3.0        |
| IN3b-i_i1_Z          | -1.0       | -1.2         | 2.2        |
| IN3b-i_i2_Z          | -1.0       | -1.1         | 1.9        |
| IN3b-i_i3_Z          | -1.2       | -1.3         | 2.4        |
| IN3b-i_i4_Z          | -1.2       | -1.3         | 2.0        |

**Table S 34:** Calculated relative energies (kcal/mol) and first vibrational frequencies for all the located conformers for **TS4b-i** regarding the nomenclature for the isophthalaldehyde's conformation displayed in **Scheme S 5** but being now between the aldehyde and the hydrazone groups. -H2O suffix refer to the assistance of the water molecule generated after the dehydration.

| TS4b-i               | $\Delta E$ | $\Delta E_0$ | $\Delta G$ | Freq    |
|----------------------|------------|--------------|------------|---------|
| TS4b-i_i1_E          | 59.9       | 54.7         | 56.6       | -2042.8 |
| TS4b-i_i2_E          | 59.8       | 54.7         | 56.5       | -2042.5 |
| TS4b-i_i3_E          | 60.0       | 54.8         | 56.5       | -2043.9 |
| TS4b-i_i4_E (TS4b-i) | 59.9       | 54.7         | 56.4       | -2043.1 |
| TS4b-i_i1_Z          | 62.4       | 57.6         | 59.3       | -1909.0 |
| TS4b-i_i2_Z          | 63.1       | 58.1         | 60.0       | -2047.8 |
| TS4b-i_i3_Z          | 63.1       | 58.1         | 59.9       | -2047.1 |

|                              |      |      |      |         |
|------------------------------|------|------|------|---------|
| TS4b-i_i4_Z                  | 62.1 | 57.4 | 59.6 | -1898.0 |
| TS4b-i_i1_E-H2O              | 24.7 | 20.3 | 23.8 | -1341.9 |
| TS4b-i_i2_E-H2O (TS4b-i-H2O) | 24.6 | 20.2 | 23.6 | -1343.0 |
| TS4b-i_i3_E-H2O              | 24.7 | 20.4 | 24.5 | -1345.7 |
| TS4b-i_i4_E-H2O              | 24.7 | 20.4 | 24.5 | -1342.8 |
| TS4b-i_i1_Z-H2O              | 29.0 | 25.4 | 30.5 | -1037.2 |
| TS4b-i_i2_Z-H2O              | 29.0 | 25.4 | 30.4 | -1033.8 |
| TS4b-i_i3_Z-H2O              | 28.9 | 25.3 | 30.3 | -1041.9 |
| TS4b-i_i4_Z-H2O              | 28.8 | 25.2 | 30.3 | -1026.0 |

**Table S 35:** Calculated relative energies (kcal/mol) and first vibrational frequencies for all the located conformers for **TSeq-i** regarding the nomenclature for the isophthalaldehyde's conformation displayed in **Scheme S 5** but being now between the aldehyde and the hydrazone groups.

| TSeq-i               | $\Delta E$ | $\Delta E_0$ | $\Delta G$ | Freq    |
|----------------------|------------|--------------|------------|---------|
| TSeq-i_i1_E (TSeq-i) | 8.8        | 5.5          | 8.2        | -1331.1 |
| TSeq-i_i2_E          | 8.7        | 5.4          | 8.3        | -1333.6 |
| TSeq-i_i3_E          | 8.9        | 5.6          | 8.6        | -1331.4 |
| TSeq-i_i4_E          | 8.8        | 5.5          | 8.5        | -1331.0 |
| TSeq-i_i1_Z          | 10.8       | 7.6          | 11.1       | -1288.2 |
| TSeq-i_i2_Z          | 10.8       | 7.5          | 10.9       | -1288.9 |
| TSeq-i_i3_Z          | 10.7       | 7.5          | 10.9       | -1290.2 |
| TSeq-i_i4_Z          | 10.6       | 7.4          | 10.9       | -1289.8 |

**Table S 36:** Calculated relative energies (kcal/mol) and first vibrational frequencies for all the located conformers for **TS3c-i** regarding the nomenclature for the isophthalaldehyde's conformation displayed in **Scheme S 5**.

| TS3c-i             | $\Delta E$ | $\Delta E_0$ | $\Delta G$ | Freq   |
|--------------------|------------|--------------|------------|--------|
| TS3c_i_i1          | 34.1       | 34.5         | 39.4       | -355.4 |
| TS3c_i_i2          | 34.1       | 34.5         | 39.3       | -356.4 |
| TS3c_i_i3          | 34.0       | 34.4         | 39.3       | -356.2 |
| TS3c_i_i4 (TS3c-i) | 34.0       | 34.4         | 39.2       | -355.3 |

**Table S 37:** Calculated relative energies (kcal/mol) for all the located conformers for **IN3c-i** regarding the nomenclature displayed for the isophthalaldehyde's conformation displayed in **Scheme S 5**.

| IN3c-i             | $\Delta E$ | $\Delta E_0$ | $\Delta G$ |
|--------------------|------------|--------------|------------|
| IN3c-i_i1          | 9.4        | 10.9         | 15.4       |
| IN3c-i_i2          | 9.4        | 11.0         | 15.5       |
| IN3c-i_i3 (IN3c-i) | 9.3        | 10.8         | 14.9       |
| IN3c-i_i4          | 9.3        | 10.8         | 15.4       |

**Table S 38:** Calculated relative energies (kcal/mol) and first vibrational frequencies for all the located conformers for **TS4c-i** regarding the nomenclature for the isophthalaldehyde's conformation displayed in **Scheme S 5**.

| TS4c-i             | $\Delta E$ | $\Delta E_0$ | $\Delta G$ | Freq    |
|--------------------|------------|--------------|------------|---------|
| TS4c-i_i1          | 42.1       | 40.6         | 44.4       | -1864.4 |
| TS4c-i_i2          | 42.1       | 40.7         | 44.6       | -1866.0 |
| TS4c-i_i3          | 42.0       | 40.6         | 44.6       | -1863.7 |
| TS4c-i_i4 (TS4c-i) | 42.0       | 40.5         | 44.3       | -1865.4 |

**Table S 39:** Calculated relative energies (kcal/mol) for all the located conformers for **IN4c-i** regarding the nomenclature displayed for the isophthalaldehyde's conformation displayed in **Scheme S 5**.

| IN4c-i             | $\Delta E$ | $\Delta E_0$ | $\Delta G$ |
|--------------------|------------|--------------|------------|
| IN4c-i_i1 (IN4c-i) | -5.7       | -3.5         | 1.1        |
| IN4c-i_i2          | -5.7       | -3.5         | 1.2        |
| IN4c-i_i3          | -5.8       | -3.5         | 1.4        |
| IN4c-i_i4          | -5.8       | -3.5         | 1.4        |

**Table S 40:** Calculated relative energies (kcal/mol) and first vibrational frequencies for all the located conformers for **TS5c** regarding the nomenclature for the isophthalaldehyde's conformation displayed in **Scheme S 5**.

| TS5c             | $\Delta E$ | $\Delta E_0$ | $\Delta G$ | Freq    |
|------------------|------------|--------------|------------|---------|
| TS5c_i1 (TS5c-i) | 46.4       | 44.6         | 49.4       | -1576.8 |
| TS5c_i2          | 46.8       | 45.0         | 49.8       | -1577.7 |
| TS5c_i3          | 46.6       | 44.8         | 49.4       | -1576.7 |
| TS5c_i4          | 46.5       | 44.8         | 49.5       | -1578.2 |

**Table S 41:** Calculated relative energies (kcal/mol) for all the located conformers for **PR-i** regarding the nomenclature displayed for the isophthalaldehyde's conformation displayed in **Scheme S 5**.

| PR-i           | $\Delta E$ | $\Delta E_0$ | $\Delta G$ |
|----------------|------------|--------------|------------|
| PR-i_i1        | -1.9       | -3.7         | -2.2       |
| PR-i_i2 (PR-i) | -6.2       | -7.3         | -4.7       |
| PR-i_i3        | -5.9       | -7.1         | -4.3       |
| PR-i_i4        | -6.1       | -7.3         | -4.6       |

Summary of the results with implicit solvation can be seen in **Figure S 3**.

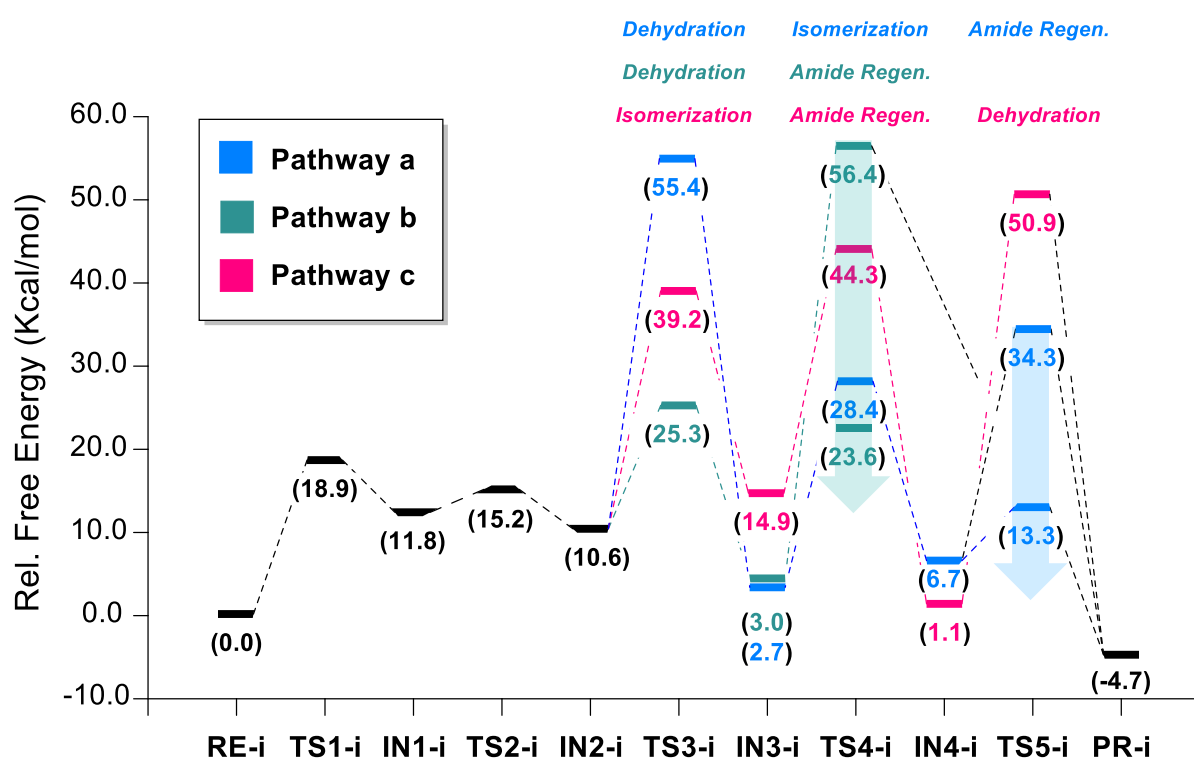

**Figure S 3:** Energetic profile for the condensation between isophthalaldehyde and isoniazide obtained at the PBE0/6-311+G (d,p) level including water at CPCM level. Arrows represent the stabilization of both **TS4b-i** and **TS5a-i** when assisted with the water molecule formed in the previous step.

### Implicit + Explicit solvent model relative energies

As it was made for the construction of all **TS1** from the gas phase mechanism, the conformational study for the explicit water solvation considered all conformers depicted in **Scheme S 5**. Previous eclipsed conformations were also considered, increasing to 4 the number of rotamers considered ( $\theta = -60^\circ, 0^\circ, 60^\circ$ , and  $180^\circ$ ), being so 64 possible TS. However, due to the demonstrated higher relative energy of the amide's E-conformers in the TSs, those structures were discarded from the analysis, reducing the conformational explored space to 32 structures. Suffix -w stands for implicit + explicit solvation structures.

**Table S 42:** Calculated relative energies (kcal/mol) for all the located conformers for **RE-w**.

| RE-w           | $\Delta E$ | $\Delta E_0$ | $\Delta G$ |
|----------------|------------|--------------|------------|
| RE-w_a1        | 0.6        | 0.5          | 0.1        |
| RE-w_a2        | 0.9        | 0.7          | 0.4        |
| RE-w_a3        | 0.7        | 0.5          | 0.0        |
| RE-w_a4        | 0.4        | 0.4          | 2.2        |
| RE-w_a5        | 0.8        | 0.6          | 0.3        |
| RE-w_a6        | 0.0        | 0.0          | 1.4        |
| RE-w_a7 (RE-w) | 0.8        | 0.6          | 0.0        |
| RE-w_a8        | 0.8        | 0.5          | 1.9        |

Since depending on the angle  $\theta$  displayed in **Scheme S 5** different intermediates are obtained, relative energies concerning structures presenting a  $\theta \approx 0^\circ$  can be found in **Table S 43**. For structures presenting other angles ( $-60^\circ$ ,  $60^\circ$ , and  $180^\circ$ ), refer to **Table S 44**.

**Table S 43:** Calculated relative energies (kcal/mol) and first vibrational frequencies for all the located conformers for **TS1-w-0** regarding the nomenclature displayed in **Scheme S 5**.

| TS1-w-0                        | $\Delta E$ | $\Delta E_0$ | $\Delta G$ | Freq   |
|--------------------------------|------------|--------------|------------|--------|
| TS1-w_i1_Z_endo_0              | 13.6       | 12.9         | 18.2       | -962.0 |
| TS1-w_i2_Z_endo_0              | 13.5       | 12.9         | 17.8       | -960.7 |
| TS1-w_i3_Z_endo_0              | 13.6       | 12.9         | 18.2       | -960.7 |
| TS1-w_i4_Z_endo_0              | 13.5       | 12.8         | 17.8       | -963.0 |
| TS1-w_i1_Z_exo_0               | 13.4       | 12.7         | 17.5       | -945.6 |
| TS1-w_i2_Z_exo_0               | 13.4       | 12.7         | 17.7       | -945.2 |
| TS1-w_i3_Z_exo_0               | 13.4       | 12.8         | 17.8       | -946.8 |
| TS1-w_i4_E_exo_0 (TS1-(0)-Z-w) | 13.4       | 12.6         | 17.6       | -949.4 |

**Table S 44:** Calculated relative energies (kcal/mol) and first vibrational frequencies for all the located conformers for **TS1-w-(60, 180, -60)** regarding the nomenclature displayed in **Scheme S 5**.

| TS1-w-(60, 180, -60) | $\Delta E$ | $\Delta E_0$ | $\Delta G$ | Freq    |
|----------------------|------------|--------------|------------|---------|
| TS1-w_i1_Z_endo_60   | 16.2       | 14.9         | 20.9       | -1072.0 |
| TS1-w_i2_Z_endo_60   | 16.2       | 14.9         | 20.9       | -1071.5 |
| TS1-w_i3_Z_endo_60   | 18.4       | 17.0         | 23.4       | -1107.4 |
| TS1-w_i4_Z_endo_60   | 16.1       | 14.8         | 21.0       | -1072.9 |

|                                      |      |      |      |         |
|--------------------------------------|------|------|------|---------|
| TS1-w_i1_Z_exo_60                    | 18.5 | 17.2 | 23.6 | -1110.3 |
| TS1-w_i2_Z_exo_60                    | 18.4 | 17.1 | 23.4 | -1110.4 |
| TS1-w_i3_Z_exo_60                    | 16.1 | 14.7 | 20.6 | -1071.2 |
| TS1-w_i4_Z_exo_60                    | 17.2 | 15.6 | 21.6 | -1119.4 |
| TS1-w_i1_Z_endo_180                  | 15.0 | 13.6 | 20.0 | -1048.9 |
| TS1-w_i2_Z_endo_180                  | 14.9 | 13.5 | 19.9 | -1050.3 |
| TS1-w_i3_Z_endo_180                  | 15.0 | 13.7 | 20.1 | -1044.5 |
| TS1-w_i4_Z_endo_180                  | 15.0 | 13.6 | 19.8 | -1047.0 |
| TS1-w_i1_Z_exo_180                   | 16.6 | 15.4 | 21.6 | -1060.9 |
| TS1-w_i2_Z_exo_180                   | 16.4 | 15.3 | 21.7 | -1065.8 |
| TS1-w_i3_Z_exo_180                   | 16.6 | 15.4 | 21.8 | -1064.8 |
| TS1-w_i4_Z_exo_180                   | 16.5 | 15.3 | 21.4 | -1058.4 |
| TS1-w_i1_Z_endo_(-60)                | 17.4 | 16.2 | 22.9 | -1066.2 |
| TS1-w_i2_Z_endo_(-60)                | 17.4 | 16.1 | 22.6 | -1063.9 |
| TS1-w_i3_Z_endo_(-60)                | 15.1 | 13.8 | 19.9 | -1027.7 |
| TS1-w_i4_Z_endo_(-60) (TS-(-60)-Z-w) | 15.1 | 13.8 | 19.8 | -1029.5 |
| TS1-w_i1_Z_exo_(-60)                 | 15.1 | 13.9 | 20.1 | -1017.4 |
| TS1-w_i2_Z_exo_(-60)                 | 15.2 | 14.1 | 20.7 | -1029.9 |
| TS1-w_i3_Z_exo_(-60)                 | 17.3 | 16.1 | 22.9 | -1067.0 |
| TS1-w_i4_Z_exo_(-60)                 | 17.3 | 16.0 | 22.4 | -1068.0 |

Relative energies regarding further steps, including pathways a, b, and c are displayed in **Tables S 45 – 57**.

**Table S 45:** Calculated relative energies (kcal/mol) for all the located conformers for **IN1-w** regarding the nomenclature displayed in **Scheme S 5**.

| IN1-w           | $\Delta E$ | $\Delta E_0$ | $\Delta G$ |
|-----------------|------------|--------------|------------|
| IN1-w_i1_Z_endo | 3.5        | 6.0          | 11.1       |
| IN1-w_i2_Z_endo | 3.4        | 6.0          | 11.3       |
| IN1-w_i3_Z_endo | 3.5        | 6.0          | 11.1       |
| IN1-w_i4_Z_endo | 3.4        | 6.0          | 11.0       |
| IN1-w_i1_Z_exo  | 3.2        | 5.8          | 11.3       |
| IN1-w_i2_Z_exo  | 3.1        | 5.7          | 11.1       |



|                        |     |     |      |
|------------------------|-----|-----|------|
| IN1-w_i3_Z_exo         | 3.1 | 5.8 | 11.1 |
| IN1-w_i4_Z_exo (IN1-w) | 3.2 | 5.7 | 10.7 |

**Table S 46:** Calculated relative energies (kcal/mol) and first vibrational frequencies for all the located conformers for **TS2-w** regarding the nomenclature displayed in **Scheme S 5**.

| TS2-w                | $\Delta E$ | $\Delta E_0$ | $\Delta G$ | Freq    |
|----------------------|------------|--------------|------------|---------|
| TS2-w_i1_endo        | 12.3       | 10.5         | 16.7       | -1308.8 |
| TS2-w_i2_endo        | 12.2       | 10.5         | 16.9       | -1308.2 |
| TS2-w_i3_endo        | 12.2       | 10.6         | 17.1       | -1307.9 |
| TS2-w_i4_endo        | 12.2       | 10.5         | 16.5       | -1306.6 |
| TS2-w_i1_exo         | 11.4       | 9.9          | 16.1       | -1278.9 |
| TS2-w_i2_exo (TS2-w) | 11.3       | 9.8          | 15.9       | -1282.6 |
| TS2-w_i3_exo         | 11.3       | 9.8          | 16.3       | -1281.8 |
| TS2-w_i4_exo         | 11.3       | 9.8          | 16.2       | -1277.8 |

**Table S 47:** Calculated relative energies (kcal/mol) for all the located conformers for **IN2-w** regarding the nomenclature displayed in **Scheme S 5**.

| IN2-w                | $\Delta E$ | $\Delta E_0$ | $\Delta G$ |
|----------------------|------------|--------------|------------|
| IN2-w_i1_endo        | 3.8        | 5.4          | 10.7       |
| IN2-w_i2_endo        | 2.7        | 4.2          | 9.3        |
| IN2-w_i3_endo        | 3.7        | 5.4          | 10.9       |
| IN2-w_i4_endo        | 3.7        | 5.3          | 10.6       |
| IN2-w_i1_exo         | 2.7        | 4.3          | 9.6        |
| IN2-w_i2_exo         | 2.7        | 4.2          | 9.6        |
| IN2-w_i3_exo (IN2-w) | 2.1        | 3.2          | 7.8        |
| IN2-w_i4_exo         | 2.6        | 4.2          | 9.5        |

**Table S 48:** Calculated relative energies (kcal/mol) and first vibrational frequencies for all the located conformers for **TS3a-w** regarding the nomenclature for the isophthalaldehyde's conformation displayed in **Scheme S 5**.

| TS3a-w      | $\Delta E$ | $\Delta E_0$ | $\Delta G$ | Freq    |
|-------------|------------|--------------|------------|---------|
| TS3a-w_i1_E | 36.2       | 33.4         | 39.9       | -1215.5 |
| TS3a-w_i2_E | 36.1       | 33.3         | 39.8       | -1208.9 |
| TS3a-w_i3_E | 36.1       | 33.3         | 39.8       | -1209.0 |

|                      |      |      |      |         |
|----------------------|------|------|------|---------|
| TS3a-w_i4_E (TS3a-w) | 36.0 | 33.2 | 39.8 | -1207.2 |
| TS3a-w_i1_Z          | 39.0 | 36.1 | 42.6 | -1245.1 |
| TS3a-w_i2_Z          | 38.5 | 36.2 | 43.0 | -1052.9 |
| TS3a-w_i3_Z          | 38.9 | 36.1 | 42.6 | -1226.3 |
| TS3a-w_i4_Z          | 38.9 | 36.0 | 42.2 | -1256.1 |

**Table S 49:** Calculated relative energies (kcal/mol) for all the located conformers for **IN3a-w** regarding the nomenclature displayed for the isophthalaldehyde's conformation displayed in **Scheme S 5**, but being now between the aldehyde and the hydrazone groups.

| IN3a-w               | $\Delta E$ | $\Delta E_0$ | $\Delta G$ |
|----------------------|------------|--------------|------------|
| IN3a-w_i1_E          | 1.1        | 0.1          | 2.8        |
| IN3a-w_i2_E (IN3a-w) | -0.3       | -1.6         | 0.9        |
| IN3a-w_i3_E          | -1.3       | -1.6         | 3.0        |
| IN3a-w_i4_E          | 0.8        | -0.1         | 3.3        |
| IN3a-w_i1_Z          | 3.2        | 2.2          | 4.1        |
| IN3a-w_i2_Z          | 4.5        | 3.6          | 5.9        |
| IN3a-w_i3_Z          | 3.2        | 2.3          | 4.6        |
| IN3a-w_i4_Z          | 3.0        | 2.1          | 4.8        |

**Table S 50:** Calculated relative energies (kcal/mol) and first vibrational frequencies for all the located conformers for **TS4a-w** regarding the nomenclature for the isophthalaldehyde's conformation displayed in **Scheme S 5** but being now between the aldehyde and the hydrazone groups.

| TS4a-w               | $\Delta E$ | $\Delta E_0$ | $\Delta G$ | Freq   |
|----------------------|------------|--------------|------------|--------|
| TS4a-w_i1_E (TS4a-w) | 16.6       | 13.6         | 19.5       | -342.3 |
| TS4a-w_i2_E          | 16.5       | 13.6         | 19.6       | -339.1 |
| TS4a-w_i3_E          | 16.7       | 13.8         | 19.6       | -334.9 |
| TS4a-w_i4_E          | 16.5       | 13.6         | 19.6       | -335.8 |
| TS4a-w_i1_Z          | 20.8       | 18.3         | 24.1       | -305.0 |
| TS4a-w_i2_Z          | 20.8       | 18.3         | 24.3       | -321.9 |
| TS4a-w_i3_Z          | 20.6       | 18.3         | 24.6       | -315.6 |
| TS4a-w_i4_Z          | 20.6       | 18.1         | 24.3       | -313.5 |

**Table S 51:** Calculated relative energies (kcal/mol) and first vibrational frequencies for all the located conformers for **TS3b-w** regarding the nomenclature for the isophthalaldehyde's conformation displayed in **Scheme S 5**.

| TS3b-w               | $\Delta E$ | $\Delta E_0$ | $\Delta G$ | Freq   |
|----------------------|------------|--------------|------------|--------|
| TS3b-w_i1_E (TS3b-w) | 21.0       | 18.7         | 22.8       | -741.3 |
| TS3b-w_i2_E          | 20.9       | 18.7         | 23.2       | -739.8 |
| TS3b-w_i3_E          | 21.0       | 18.7         | 23.3       | -734.9 |
| TS3b-w_i4_E          | 21.0       | 18.8         | 23.6       | -744.2 |
| TS3b-w_i1_Z          | 23.8       | 21.8         | 26.7       | -626.0 |
| TS3b-w_i2_Z          | 23.8       | 21.8         | 26.9       | -618.3 |
| TS3b-w_i3_Z          | 24.0       | 21.9         | 27.0       | -636.3 |
| TS3b-w_i4_Z          | 24.0       | 22.0         | 27.2       | -621.4 |

**Table S 52:** Calculated relative energies (kcal/mol) for all the located conformers for **IN3b-w** regarding the nomenclature displayed for the isophthalaldehyde's conformation displayed in **Scheme S 5**, but being now between the aldehyde and the hydrazone groups.

| IN3b-w               | $\Delta E$ | $\Delta E_0$ | $\Delta G$ |
|----------------------|------------|--------------|------------|
| IN3b-w_i1_E (IN3b-w) | -1.2       | -1.9         | -0.3       |
| IN3b-w_i2_E          | -1.2       | -1.9         | 0.1        |
| IN3b-w_i3_E          | -2.8       | -2.6         | 1.9        |
| IN3b-w_i4_E          | -1.4       | -1.7         | 1.9        |
| IN3b-w_i1_Z          | -4.6       | -4.6         | -0.8       |
| IN3b-w_i2_Z          | -4.5       | -4.5         | -0.9       |
| IN3b-w_i3_Z          | -4.5       | -4.7         | -1.2       |
| IN3b-w_i4_Z          | -4.7       | -4.8         | -1.0       |

**Table S 53:** Calculated relative energies (kcal/mol) and first vibrational frequencies for all the located conformers for **TS4b-w** regarding the nomenclature for the isophthalaldehyde's conformation displayed in **Scheme S 5** but being now between the aldehyde and the hydrazone groups. -H2O suffix refer to the assistance of the second water molecule generated after the dehydration.

| TS4b-w      | $\Delta E$ | $\Delta E_0$ | $\Delta G$ | Freq    |
|-------------|------------|--------------|------------|---------|
| TS4b-i_i1_E | 24.2       | 19.3         | 22.8       | -1436.0 |
| TS4b-i_i2_E | 24.1       | 19.3         | 22.7       | -1435.5 |
| TS4b-i_i3_E | 24.2       | 19.4         | 23.2       | -1430.2 |
| TS4b-i_i4_E | 24.2       | 19.3         | 22.8       | -1435.3 |

|                          |      |      |      |         |
|--------------------------|------|------|------|---------|
| TS4b-i_i1_Z              | 28.8 | 23.9 | 27.8 | -1370.9 |
| TS4b-i_i2_Z              | 28.8 | 24.3 | 29.0 | -1319.0 |
| TS4b-i_i3_Z              | 28.8 | 24.4 | 29.2 | -1290.1 |
| TS4b-i_i4_Z              | 28.8 | 24.3 | 28.7 | -1258.8 |
| TS4b-i_i1_E-H2O          | 13.3 | 8.8  | 14.9 | -917.7  |
| TS4b-i_i2_E-H2O          | 13.2 | 8.8  | 14.9 | -925.3  |
| TS4b-i_i3_E-H2O          | 13.4 | 8.8  | 14.8 | -942.2  |
| TS4b-i_i4_E-H2O (TS4b-w) | 13.2 | 8.7  | 14.7 | -930.3  |
| TS4b-i_i1_Z-H2O          | 17.2 | 12.2 | 18.6 | -1041.2 |
| TS4b-i_i2_Z-H2O          | 17.1 | 12.3 | 18.7 | -1034.8 |
| TS4b-i_i3_Z-H2O          | 17.1 | 12.2 | 18.5 | -1046.7 |
| TS4b-i_i4_Z-H2O          | 17.1 | 12.2 | 18.7 | -1042.4 |

**Table S 54:** Calculated relative energies (kcal/mol) and first vibrational frequencies for all the located conformers for TSeq-w regarding the nomenclature for the isophthalaldehyde's conformation displayed in Scheme S 5 but being now between the aldehyde and the hydrazone groups.

| TSeq-w               | $\Delta E$ | $\Delta E_0$ | $\Delta G$ | Freq    |
|----------------------|------------|--------------|------------|---------|
| TSeq-w_i1_E          | 7.3        | 3.0          | 7.1        | -957.5  |
| TSeq-w_i2_E (TSeq-w) | 7.2        | 2.9          | 7.0        | -959.9  |
| TSeq-w_i3_E          | 5.3        | 1.8          | 7.8        | -1071.7 |
| TSeq-w_i4_E          | 7.2        | 3.0          | 7.7        | -945.8  |
| TSeq-w_i1_Z          | 8.3        | 3.9          | 7.4        | -1018.1 |
| TSeq-w_i2_Z          | 8.3        | 4.1          | 7.8        | -1021.8 |
| TSeq-w_i3_Z          | 8.2        | 3.9          | 7.7        | -1019.0 |
| TSeq-w_i4_Z          | 8.1        | 3.9          | 7.9        | -1022.3 |

**Table S 55:** Calculated relative energies (kcal/mol) and first vibrational frequencies for all the located conformers for IN3c-w-(60, 180, -60) regarding the nomenclature displayed in Scheme S 5.

| IN3c-w-(60, 180, -60) | $\Delta E$ | $\Delta E_0$ | $\Delta G$ | Freq |
|-----------------------|------------|--------------|------------|------|
| IN3c-w_i1_endo_60     | -5.1       | -2.8         | 2.2        | 17.7 |
| IN3c-w_i2_endo_60     | -5.0       | -2.8         | 2.0        | 14.6 |
| IN3c-w_i3_endo_60     | -5.3       | -2.8         | 2.5        | 17.5 |
| IN3c-w_i4_endo_60     | -5.2       | -2.8         | 2.4        | 16.9 |

|                              |      |      |     |      |
|------------------------------|------|------|-----|------|
| IN3c-w_i1_exo_60             | -7.0 | -4.5 | 1.1 | 12.9 |
| IN3c-w_i2_exo_60             | -7.2 | -4.7 | 1.1 | 15.1 |
| IN3c-w_i3_exo_60             | -7.1 | -4.6 | 1.2 | 14.6 |
| IN3c-w_i4_exo_60             | -7.1 | -4.6 | 0.9 | 11.5 |
| IN3c-w_i1_endo_180           | -5.1 | -2.8 | 2.7 | 18.6 |
| IN3c-w_i2_endo_180           | -5.3 | -3.0 | 2.5 | 18.5 |
| IN3c-w_i3_endo_180           | -5.1 | -2.7 | 2.8 | 19.5 |
| IN3c-w_i4_endo_180           | -5.2 | -2.9 | 2.4 | 15.9 |
| IN3c-w_i1_exo_180            | -7.0 | -4.7 | 0.6 | 12.8 |
| IN3c-w_i2_exo_180            | -7.1 | -4.7 | 0.8 | 15.3 |
| IN3c-w_i3_exo_180            | -7.0 | -4.6 | 0.7 | 11.5 |
| IN3c-w_i4_exo_180            | -7.0 | -4.6 | 0.9 | 18.2 |
| IN3c-w_i1_endo_(-60)         | -5.4 | -3.1 | 2.3 | 17.7 |
| IN3c-w_i2_endo_(-60)         | -5.4 | -3.1 | 1.9 | 16.1 |
| IN3c-w_i3_endo_(-60)         | -5.5 | -3.1 | 2.2 | 18.0 |
| IN3c-w_i4_endo_(-60)         | -5.5 | -3.2 | 2.1 | 17.1 |
| IN3c-w_i1_exo_(-60)          | -7.7 | -5.1 | 0.9 | 17.2 |
| IN3c-w_i2_exo_(-60)          | -7.7 | -5.2 | 0.5 | 13.5 |
| IN3c-w_i3_exo_(-60) (IN3c-w) | -7.8 | -5.4 | 0.3 | 15.4 |
| IN3c-w_i4_exo_(-60)          | -7.8 | -5.3 | 0.4 | 18.5 |

**Table S 56:** Calculated relative energies (kcal/mol) and first vibrational frequencies for all the located conformers for **TS4c-w** regarding the nomenclature for the isophthalaldehyde's conformation displayed in **Scheme S 5**.

| TS4c-w               | $\Delta E$ | $\Delta E_0$ | $\Delta G$ | Freq    |
|----------------------|------------|--------------|------------|---------|
| TS4c-w_i1_E (TS4c-w) | 27.2       | 25.1         | 32.3       | -1187.8 |
| TS4c-w_i2_E          | 27.2       | 25.2         | 32.4       | -1188.6 |
| TS4c-w_i3_E          | 27.4       | 25.4         | 32.8       | -1186.5 |
| TS4c-w_i4_E          | 27.3       | 25.3         | 32.5       | -1179.8 |
| TS4c-w_i1_Z          | 28.2       | 26.3         | 33.9       | -1070.8 |
| TS4c-w_i2_Z          | 28.1       | 26.3         | 33.8       | -1074.1 |
| TS4c-w_i3_Z          | 28.1       | 26.3         | 33.9       | -1064.8 |
| TS4c-w_i4_Z          | 28.1       | 26.3         | 34.0       | -1071.4 |

**Table S 57:** Calculated relative energies (kcal/mol) for all the located conformers for **PR-w** regarding the nomenclature displayed for the isophthalaldehyde's conformation displayed in **Scheme S 5** but being now between the aldehyde and the hydrazone groups.

| PR-w      | $\Delta E$ | $\Delta E_0$ | $\Delta G$ |
|-----------|------------|--------------|------------|
| PR-i_i1_E | -7.9       | -8.9         | -6.5       |
| PR-i_i2_E | -3.8       | -4.1         | -0.4       |
| PR-i_i3_E | -6.8       | -8.0         | -6.7       |
| PR-i_i4_E | -8.1       | -9.0         | -6.1       |
| PR-i_i1_Z | -3.0       | -3.8         | -2.3       |
| PR-i_i2_Z | -2.5       | -3.4         | -1.2       |
| PR-i_i3_Z | -3.1       | -3.9         | -2.1       |
| PR-i_i4_Z | -3.0       | -3.8         | -2.1       |

Energy comparison between gas, implicit, and implicit + explicit solvent models is depicted in **Figure S 4**. No assistance for the previously generated water molecule was considered. Otherwise, alternative mechanism with water assistance can be seen in **Figure S 5**.

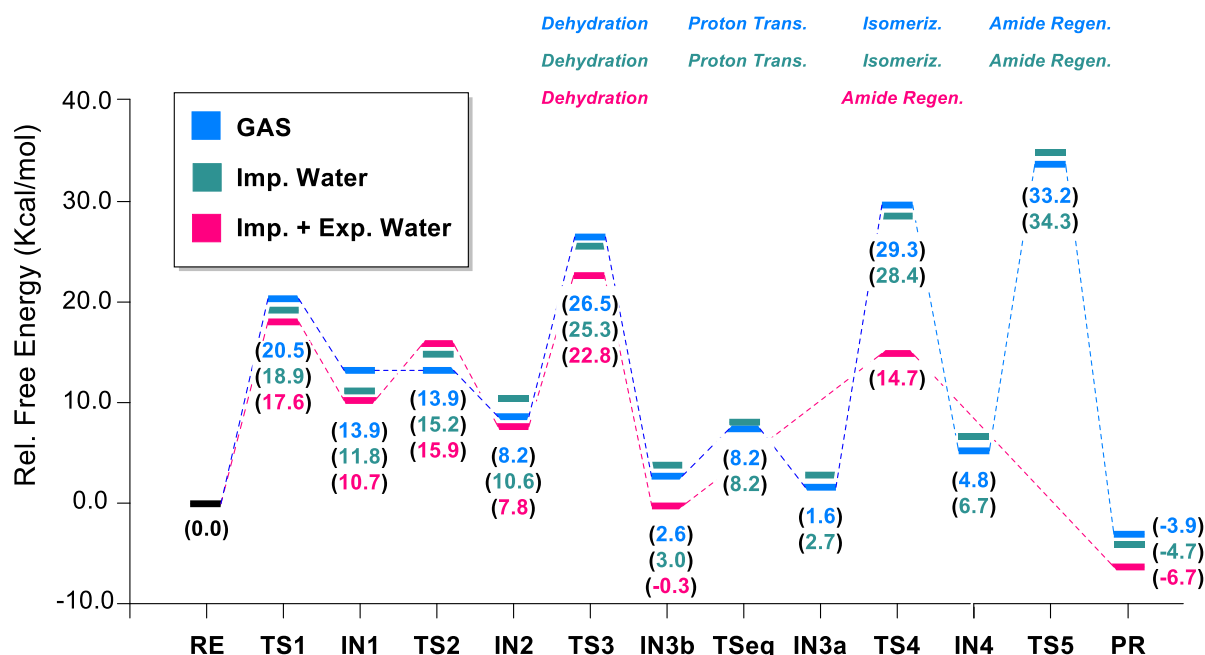

**Figure S 4:** Comparison of the energy profile in the unassisted water molecule mechanism in both gas phase, implicit solvation, and implicit + explicit water solvation models. Fast equilibration between **IN3a** and **IN3b** has been included in contrast to the main text in which was omitted for clarity.

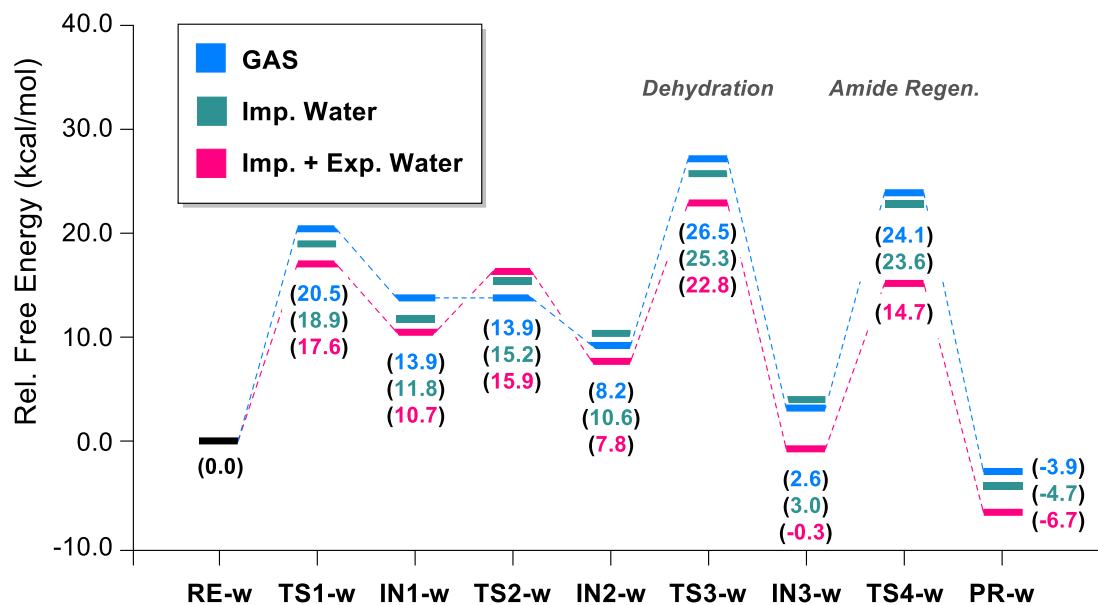

**Figure S 5:** Comparison of the energy profile in the assisted water molecule mechanism in both gas phase, implicit solvation, and implicit + explicit water solvation models.

### Optimized Structures

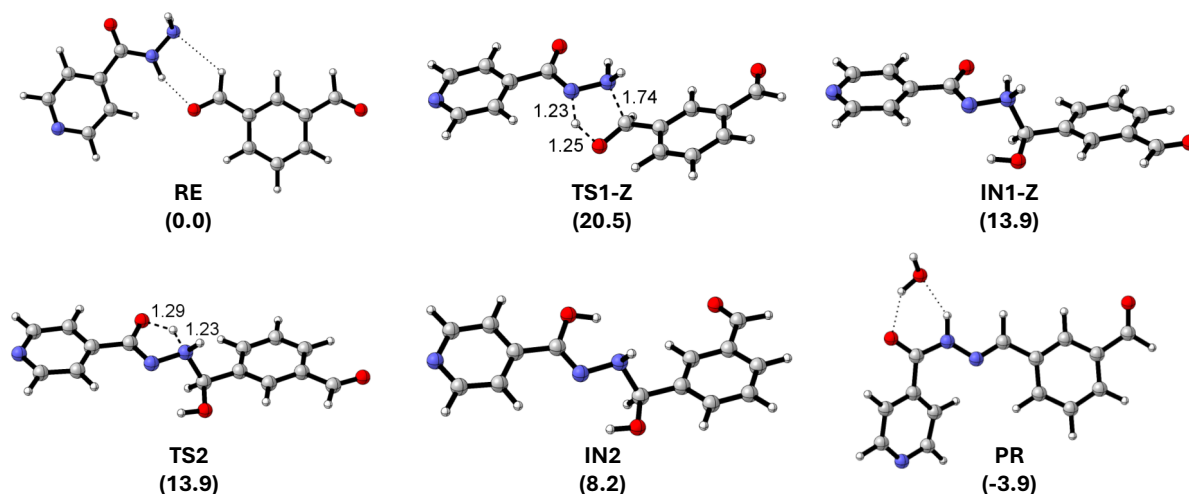

**Figure S 6:** Optimized structures for the common pathway in the gas phase.

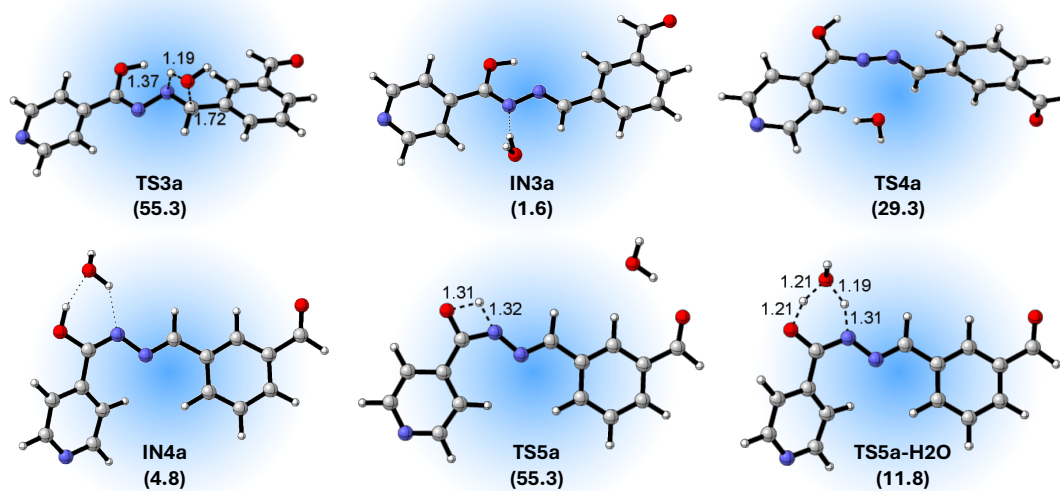

Figure S 7: Optimized structures for the pathway a in the gas phase.

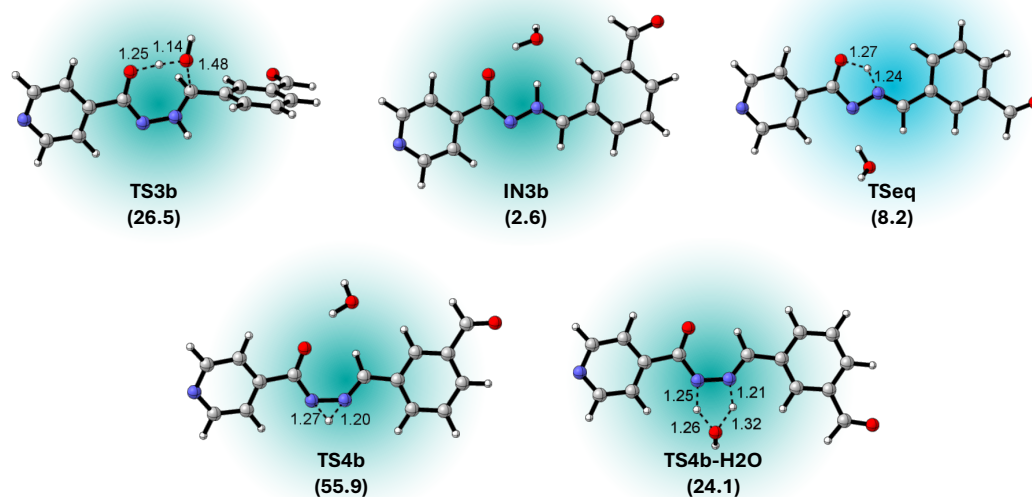

Figure S 8: Optimized structures for the pathway b in the gas phase.



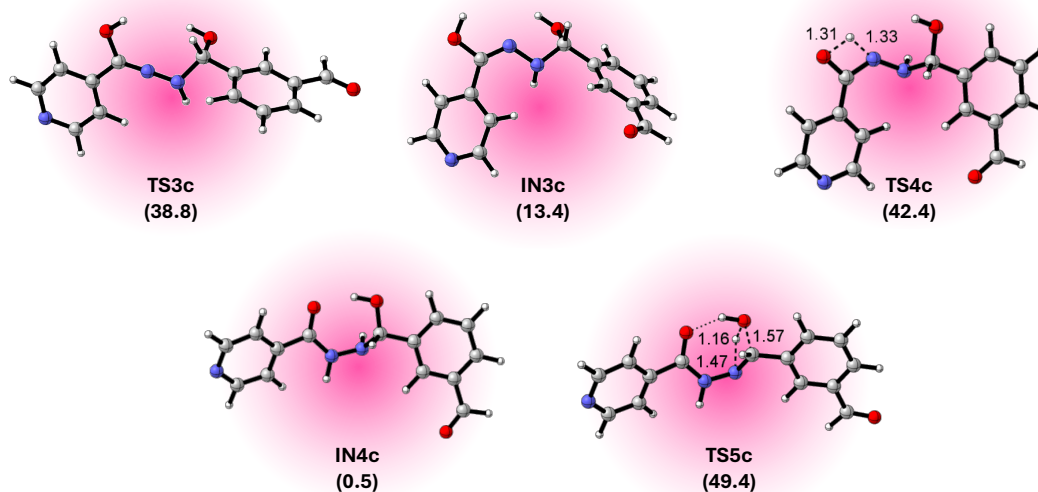

**Figure S 9:** Optimized structures for the pathway c in the gas phase.

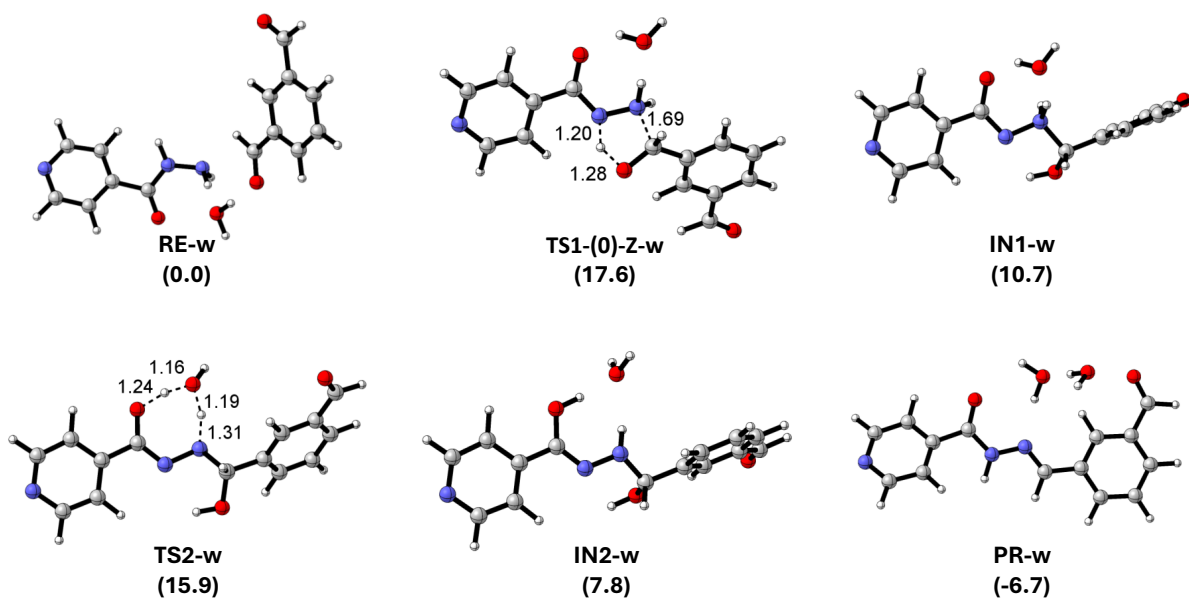

**Figure S 10:** Optimized structures for the common pathway in the implicit + explicit solvation model.

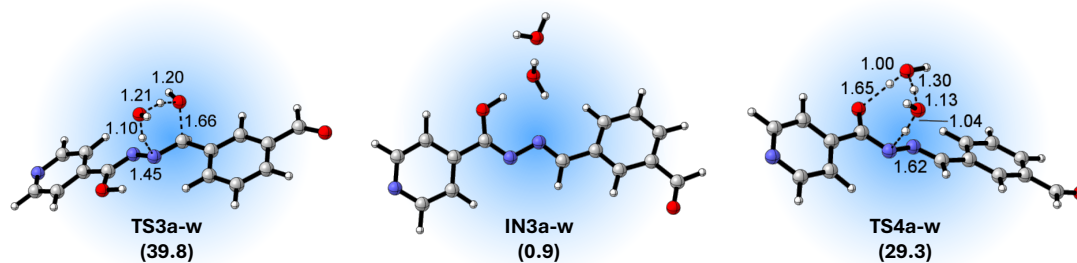

**Figure S 11:** Optimized structures for the pathway a in the implicit + explicit solvation model.

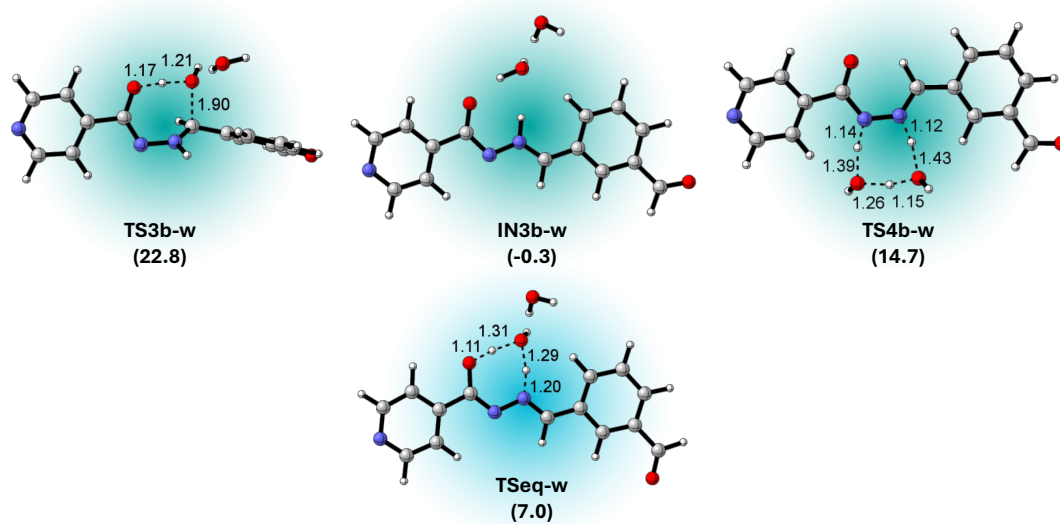

**Figure S 12:** Optimized structures for the pathway b in the implicit + explicit solvation model.

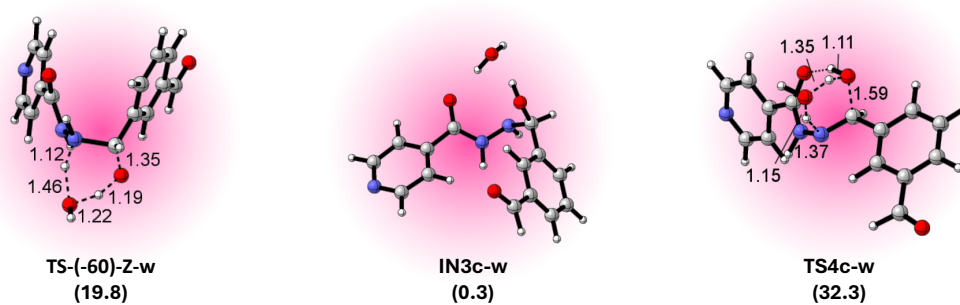

**Figure S 13:** Optimized structures for the pathway c in the implicit + explicit solvation model.
